# Supplementary material for: Hierarchical multi-shell 66-nuclei silver nanoclusters trapping subvalent Ag6kernels
Source: Royal Society of Chemistry journal article supplement (doi:10.1039/c9cc05044b), 2019-01-01
Supplement: c9cc05044b1.pdf [file c9cc05044b1.pdf]

## Electronic Supplementary Information (ESI)

### Hierarchical Multi-shell 66-Nuclei Silver Nanoclusters Trapping Subvalent Ag<sub>6</sub> Kernels

Zhi Wang,<sup>#b</sup> Feng-Lei Yang,<sup>#a</sup> Yang Yang,<sup>\*a</sup> Qing-Yun Liu,<sup>c</sup> Di Sun<sup>\*b</sup>

*<sup>a</sup>School of Chemistry and Materials Science, Jiangsu Key Laboratory of Green Synthetic Chemistry for Functional Materials, Jiangsu Normal University, Xuzhou 221116, China. E-mail: yangyang@jsnu.edu.cn.*

*<sup>b</sup>Key Laboratory of Colloid and Interface Chemistry, Ministry of Education, School of Chemistry and Chemical Engineering, State Key Laboratory of Crystal Materials, Shandong University, Jinan, 250100, People's Republic of China. E-mail: dsun@sdu.edu.cn.*

*<sup>c</sup>College of Chemical and Environmental Engineering, Shandong University of Science and Technology, Qingdao, 266590, P. R. China.*

*<sup>#</sup>These authors contribute equally.*

## Experimental details

The precursors,  $(^i\text{PrSAg})_n$  and  $(^i\text{BuSAg})_n$ <sup>1</sup> and the POMs template of  $(^n\text{Bu}_4\text{N})_4(\text{Mo}_8\text{O}_{26})^2$  were prepared by following the reported procedures. All chemicals and solvents used in the syntheses were of analytical grade and used without further purification.  $^i\text{PrSH}$  (Adamas-beta®) and  $^i\text{BuSH}$  (Adamas-beta®) were purchased from Shanghai Titan Scientific Co.,Ltd. The elemental analyses (C, H contents) were determined on a Vario EL III analyzer. The diffuse-reflectance spectrum were performed on UV–Vis spectrophotometer (Evolution 220, ISA-220 accessory, Thermo Scientific) using a built-in 10 mm silicon photodiode with a 60 mm Spectralon sphere. Morphology of the samples and elemental composition analyses were measured using an SU-8010 field emission scanning electron microscope (FESEM; Hitachi Ltd., Tokyo, Japan) equipped with an Oxford-Horiba Inca XMax50 energy dispersive X-ray spectroscopy (EDS) attachment (Oxford Instruments Analytical, High Wycombe, England). Mass spectra were recorded on an Agilent 6224 (Agilent Technologies, USA) ESI-TOF-MS spectrometer. Sample solutions are infused by a syringe pump at 4  $\mu\text{L}/\text{min}$ . Data were acquired using the following settings: ESI capillary voltage was set at 3500 V (–) ion mode and fragmentor at 200 V. The liquid nebulizer was set to 15 psig and the nitrogen drying gas was set to a flow rate of 4 L/min. Drying gas temperature was maintained at 150 °C. The data analyses of mass spectra were performed based on the isotope distribution patterns using Agilent MassHunter Workstation Data acquisition software (Version B.05.00). The reported  $m/z$  values represent monoisotopic mass of the most abundant peak within the isotope pattern.  $^{13}\text{C}$  NMR spectrum was recorded in a J. Young NMR tube on Bruker Avance 500 spectrometers. The chemical shifts are reported in parts per million  $\delta$  (ppm) referenced to the residual proton signal of the deuterated methanol. X-ray photoelectron spectra (XPS) were recorded with a Quantum 2000 X-ray scanning ESCA microprobe. The single crystals were put under UHV to reach the  $10^{-8}$  Pa range. The nonmonochromatized Al  $K\alpha$  source was used at 10 kV and 10 mA. The binding energy of the spectrum was calibrated in relation to the C 1s binding energy (284.0 eV), which was applied as an internal standard.

# X-ray crystallography

## Data Collection and Treatment Details

Single crystal of **SD/Ag66b-SD/Ag66d** with appropriate dimensions was chosen under an optical microscope and quickly coated with high vacuum grease (Dow Corning Corporation) to prevent decomposition. Single-crystal X-ray diffraction data of **SD/Ag66b** was collected on a Rigaku Oxford Diffraction XtaLAB Synergy diffractometer equipped with a HyPix-6000HE area detector at 100 K using Mo K $\alpha$  ( $\lambda = 0.71073 \text{ \AA}$ ) from PhotonJet micro-focus X-ray Source. The diffraction images were processed and scaled using the CrysAlisPro software.<sup>3</sup> Single-crystal X-ray diffraction data of **SD/Ag66c** and **SD/Ag66d** were recorded on a Bruker Apex II single crystal diffractometer and a CCD area detector at 173 and 100 K. The raw frame data were processed using SAINT and SADABS to yield the reflection data file.<sup>4</sup> The structure was solved using the charge-flipping algorithm, as implemented in the program *SUPERFLIP*<sup>5</sup> and refined by full-matrix least-squares techniques against  $F_o^2$  using the SHELXL program<sup>6</sup> through the OLEX2 interface.<sup>7</sup> Hydrogen atoms at carbon were placed in calculated positions and refined isotropically by using a riding model. Appropriate restraints or constraints were applied to the geometry and the atomic displacement parameters of the atoms in the cluster. All structures were examined using the Addsym subroutine of PLATON<sup>8</sup> to ensure that no additional symmetry could be applied to the models. Pertinent crystallographic data collection and refinement parameters are collated in Table S2. Selected bond lengths and angles are collated in Table S3.

## Specific Refinement Details

The crystals of **SD/Ag66b-SD/Ag66d** were weakly diffracting with very few reflections recorded at higher than 0.9  $\text{\AA}$  resolution. Due to the wide presence of disordered groups in three clusters, structural refinements are very challenging and several restraint commands were widely used during the refinements.

For **SD/Ag66b**, all non-H atoms were located in the electron density and refined with anisotropic thermal parameters. Due to the less than ideal resolution, DFIX restraints were applied to keep the bond lengths (C=O bond 1.25  $\text{\AA}$  and C-C bond 1.55  $\text{\AA}$ ) in reasonable ranges. FLAT restraints were applied to keep the planarity of carboxylate group with one attached C atom or benzene ring. SIMU

restraints were also used for some ligands with large thermal motion as well as two disordered silver atoms. The more detailed information can be found in ‘\_olex2\_refinement\_description’ loop in CIF file.

For **SD/Ag66c**, all non-H atoms were located in the electron density and all Ag, Mo, S atoms were refined with anisotropic thermal parameters. Partial light atoms (C and O) were refined with isotropic thermal parameters due to the large thermal motion or some unresolved disorder which could not be modeled despite many attempts. Due to the less than ideal resolution, DFIX restraints were applied to keep the bond lengths (C=O bond 1.25 Å; C-S bond 1.85 Å and C-C bond 1.55 Å) in reasonable ranges. FLAT restraints were applied to keep the planarity of carboxylate group with one attached C atom or benzene ring. SIMU restraints were also used for some ligands with large thermal motion as well as some disordered silver atoms. AFIX 66 was used for some benzene rings to keep their normal geometry like hexagon. The more detailed information can be found in ‘\_olex2\_refinement\_description’ loop in CIF file.

For **SD/Ag66d**, all non-H atoms were located in the electron density and all Ag, Mo, S atoms were refined with anisotropic thermal parameters. Partial light atoms (C and O) were refined with isotropic thermal parameters due to the large thermal motion or some unresolved disorder which could not be modeled despite many attempts. Due to the less than ideal resolution, DFIX restraints were applied to keep the bond lengths (C=O bond 1.25 Å; C-S bond 1.85 Å and C-C bond 1.55 Å) in reasonable ranges. FLAT restraints were applied to keep the planarity of carboxylate group with one attached C atom or benzene ring. SIMU restraints were also used for some ligands with large thermal motion as well as some disordered silver atoms. The more detailed information can be found in ‘\_olex2\_refinement\_description’ loop in CIF file.

For **SD/Ag66c** and **SD/Ag66d**, the lattices contain large solvents and anions accessible voids, but they are highly disordered and therefore could not be modelled. Instead, they are treated by the program SQUEEZE.<sup>9</sup> These electrons removed by SQUEEZE have been assigned as some solvents and anions. The more detailed information can be found in ‘\_platon\_squeeze\_details’ loop in CIF file.

In all, despite an  $R_1$  value that was not very good and resolution that was poorer than generally obtained in crystallography of some small molecules, a reasonable quality refinement was achieved, and the current data is more than adequate for establishing the average connectivity of the structure.

## Synthesis Details

### Synthesis of SD/Ag66b

PhCOOAg (0.1 mmol, 27.9 mg) and (*i*PrSAg)<sub>n</sub> (0.05 mmol, 9.2 mg) together with [(*n*-C<sub>4</sub>H<sub>9</sub>)<sub>4</sub>N][α-Mo<sub>8</sub>O<sub>26</sub>] (0.0002 mmol, 4.2 mg) were dissolved in a mixed solvent of methanol : *N,N'*-dimethylformamide (5 mL v/v = 1/1). The reaction mixture was sealed and heated at 65 °C for 2000 min, and then cooled to room temperature for 800 min. Then the yellow crystals of **SD/Ag66b** were crystallized in the yields of 11 %.

### Synthesis of SD/Ag66c

The synthetic condition was similar to that described for **SD/Ag66b**, except that the (*i*PrSAg)<sub>n</sub> was substituted by (*i*BuSAg)<sub>n</sub> (0.05 mmol, 9.9 mg), then the yellow crystals of **SD/Ag66c** were crystallized in the yields of 12 %.

### Synthesis of SD/Ag66d

The synthetic condition was similar to that described for **SD/Ag66b**, except that the PhCOOAg was substituted by AgOAc (0.1 mmol, 16.7 mg). After cooling to room temperature, the colorless solution was filtered and the filtrate left to evaporate slowly for one month in the dark at room temperature. Pale yellow crystals of **SD/Ag66d** were crystallized in a yield of 15 %.

**Figure S1:** a) Crystal structure of **SD/Ag66c**; b) side view of crystal structure of **SD/Ag66c**; c) core structure of **SD/Ag66c**. Hydrogen atoms are omitted for clarity. Color legend: Pink/dark blue Ag; gray C; red O; yellow S. The  $\text{MoO}_4$  units are represented as the green tetrahedron; the innermost  $\text{Ag}_6$  is differentiated as dark blue.

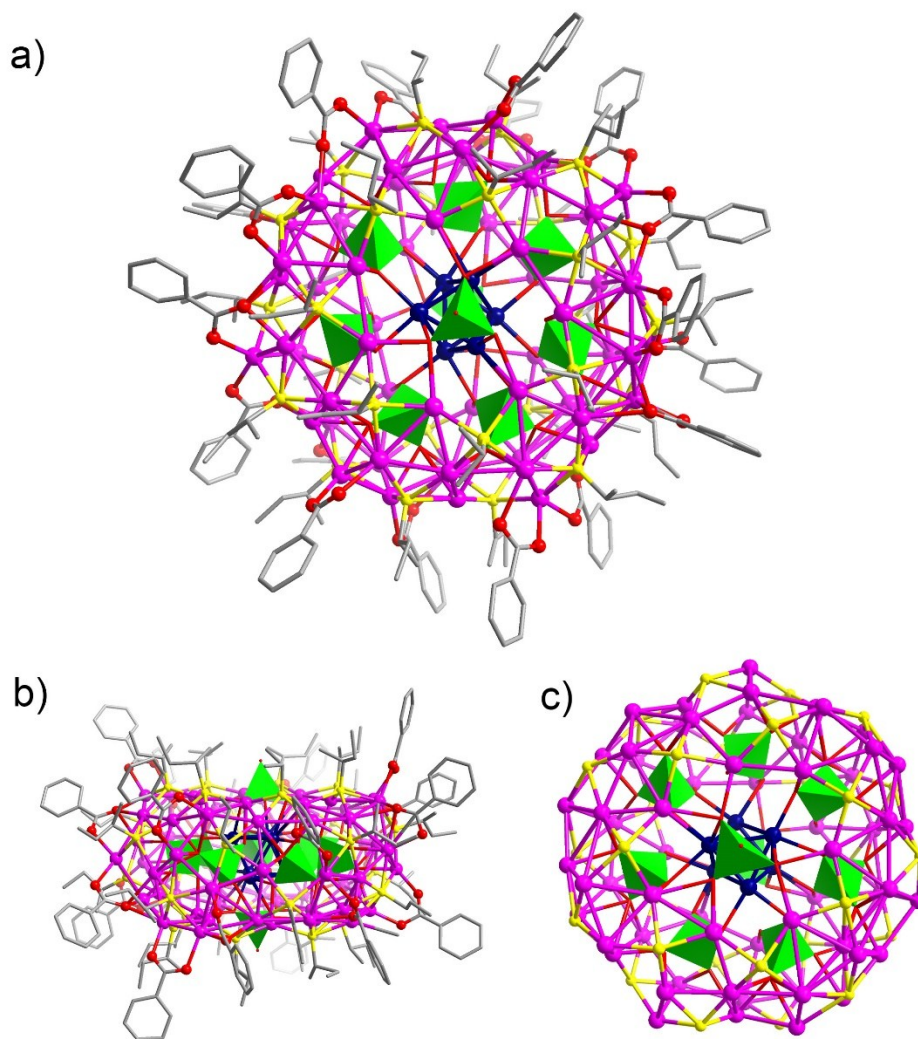

**Figure S2:** a) Crystal structure of **SD/Ag66d**; b) side view of crystal structure of **SD/Ag66d**; c) core structure of **SD/Ag66d**. Hydrogen atoms are omitted for clarity. Color legend: Pink/dark blue Ag; gray C; red O; yellow S. The  $\text{MoO}_4$  units are represented as the green tetrahedron; the innermost  $\text{Ag}_6$  is differentiated as dark blue.

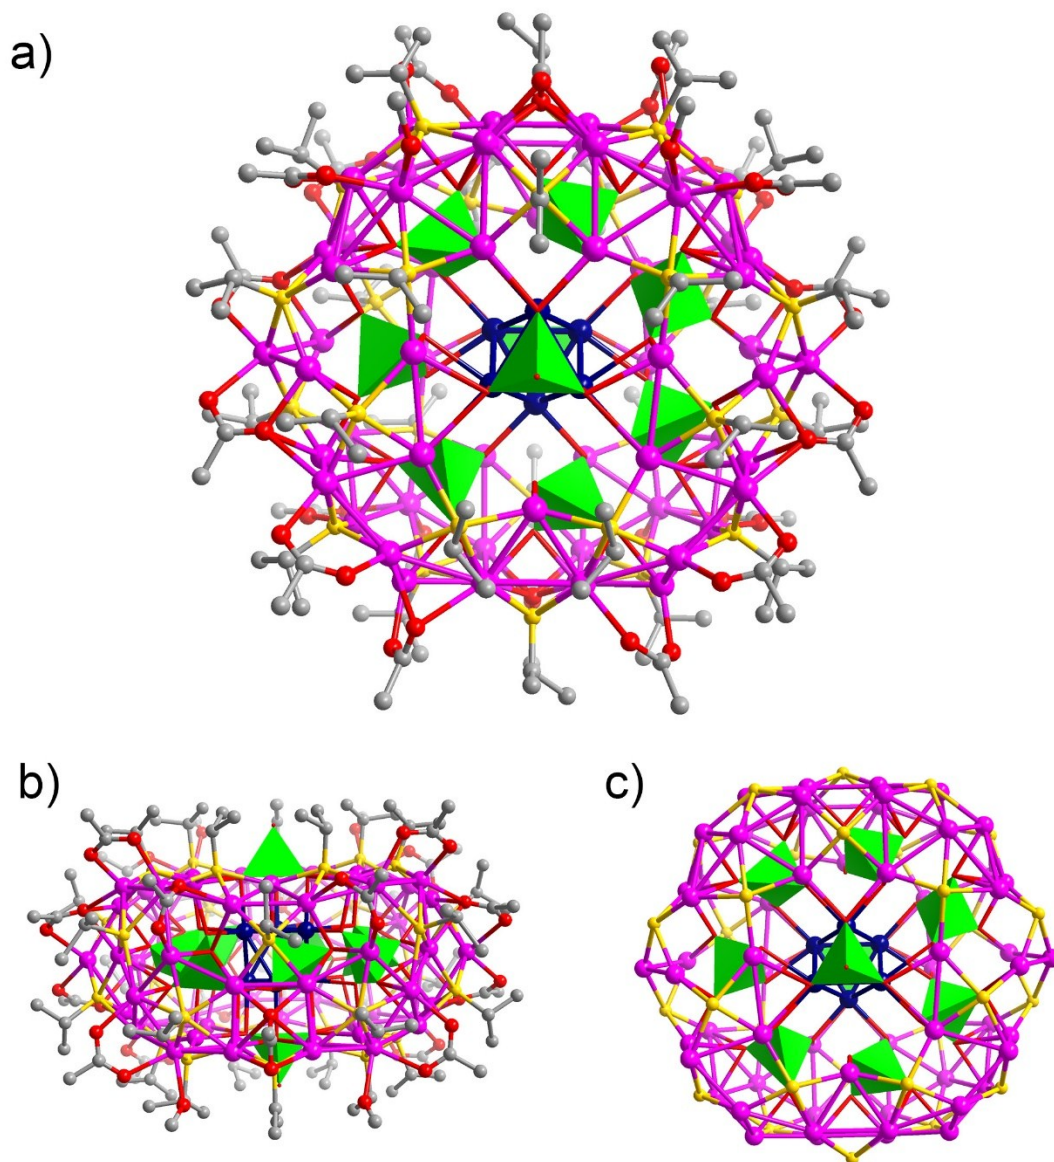

**Figure S3:** Core size of SD/Ag66b

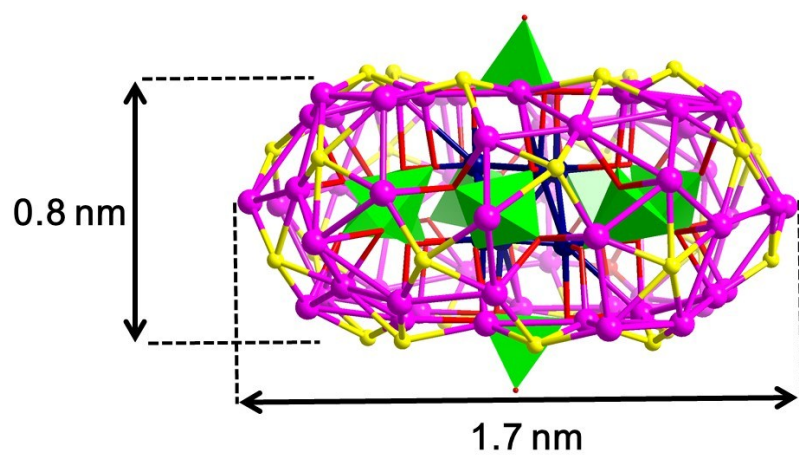



**Figure S4:** Coordination modes of benzoate ions in the  $\text{Ag}_{60}$  shell. The  $\mu_4\text{-O}, \text{O}', \text{O}', \text{O}'$  bridged benzoate ions filling the gaps between the pentagons and tetragons are shown in green. The pentagons are highlighted as bold brown.

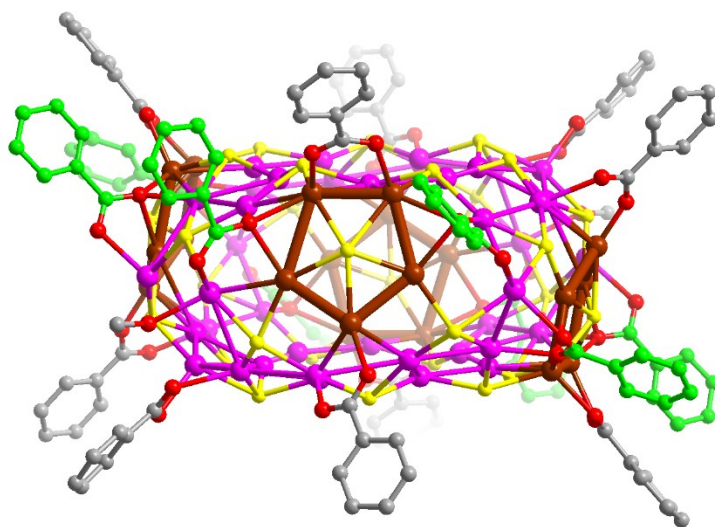

Figure S5: High resolution XPS spectrum of Ag 3d<sub>5/2</sub>.

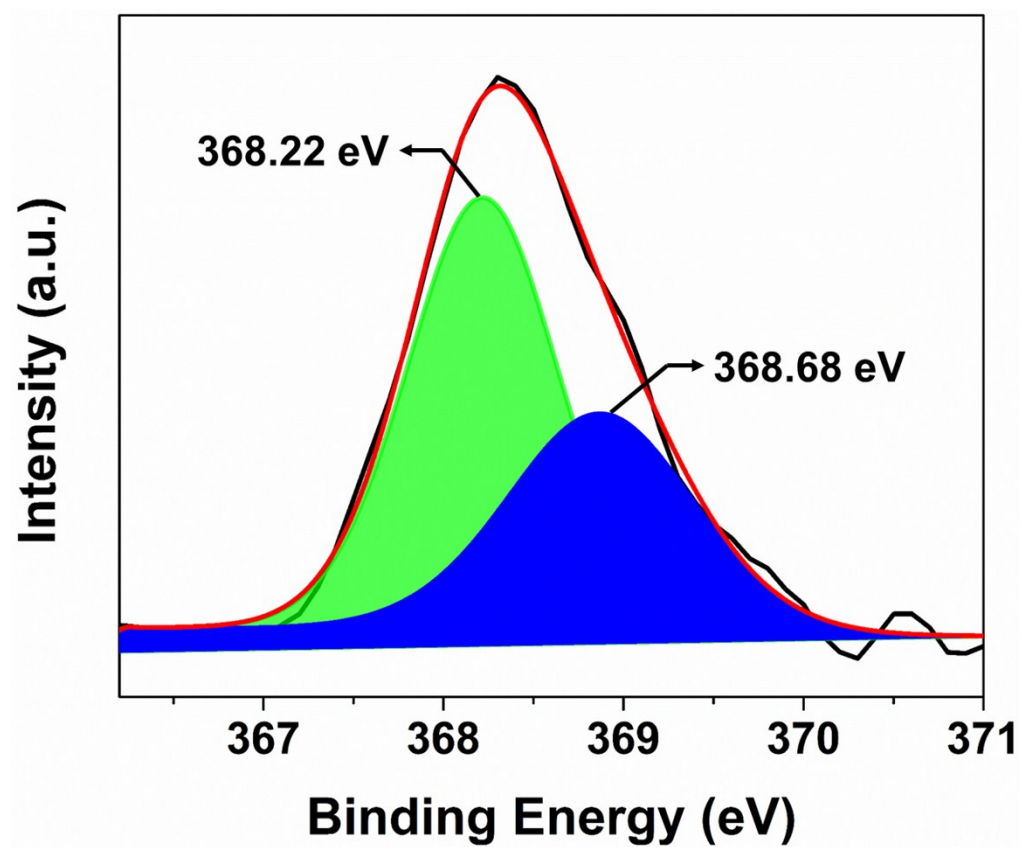

**Figure S6:**  $^{13}\text{C}$  NMR of HCl digested reaction mother solution for **SD/Ag66d**.

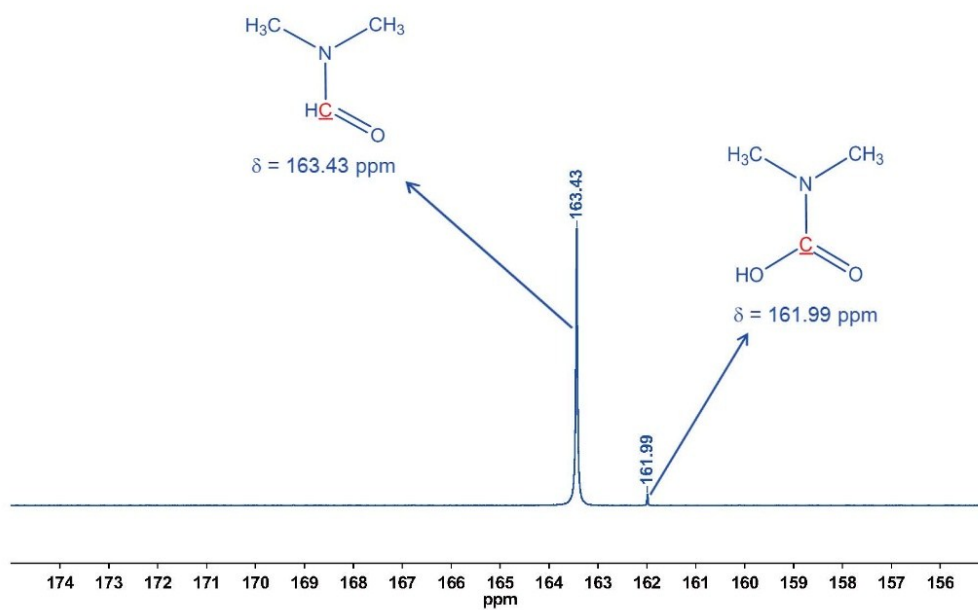

**Figure S7:** a) Asymmetric unit of **SD/Ag66b** with seven positions of Mo are identified with half occupation at the equatorial region. b) whole cluster of **SD/Ag66b** with the half occupied 14 positions of Mo linking into a circle. Color legend: Pink Ag; gray C; aquamarine Mo; red O; yellow S; pale white H.

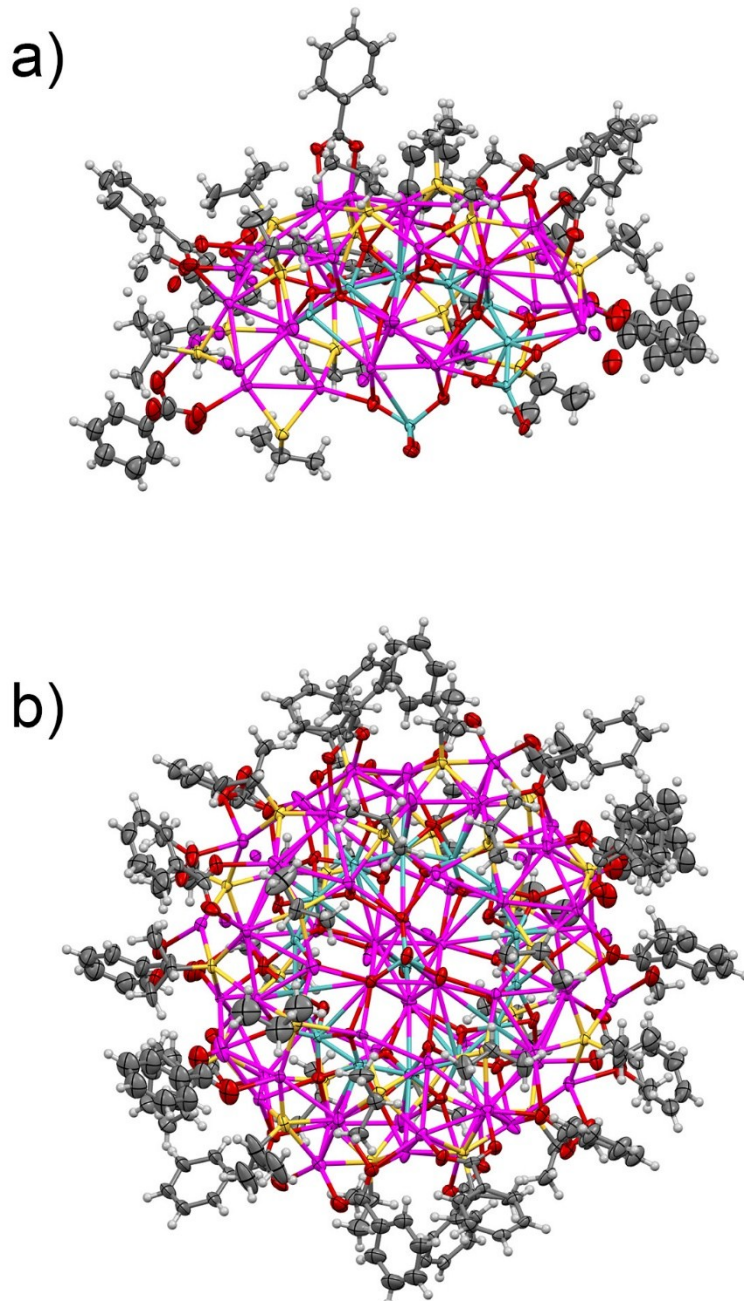

**Figure S8:** The theoretical and experimental isotope distributions of species **3a-3h**.

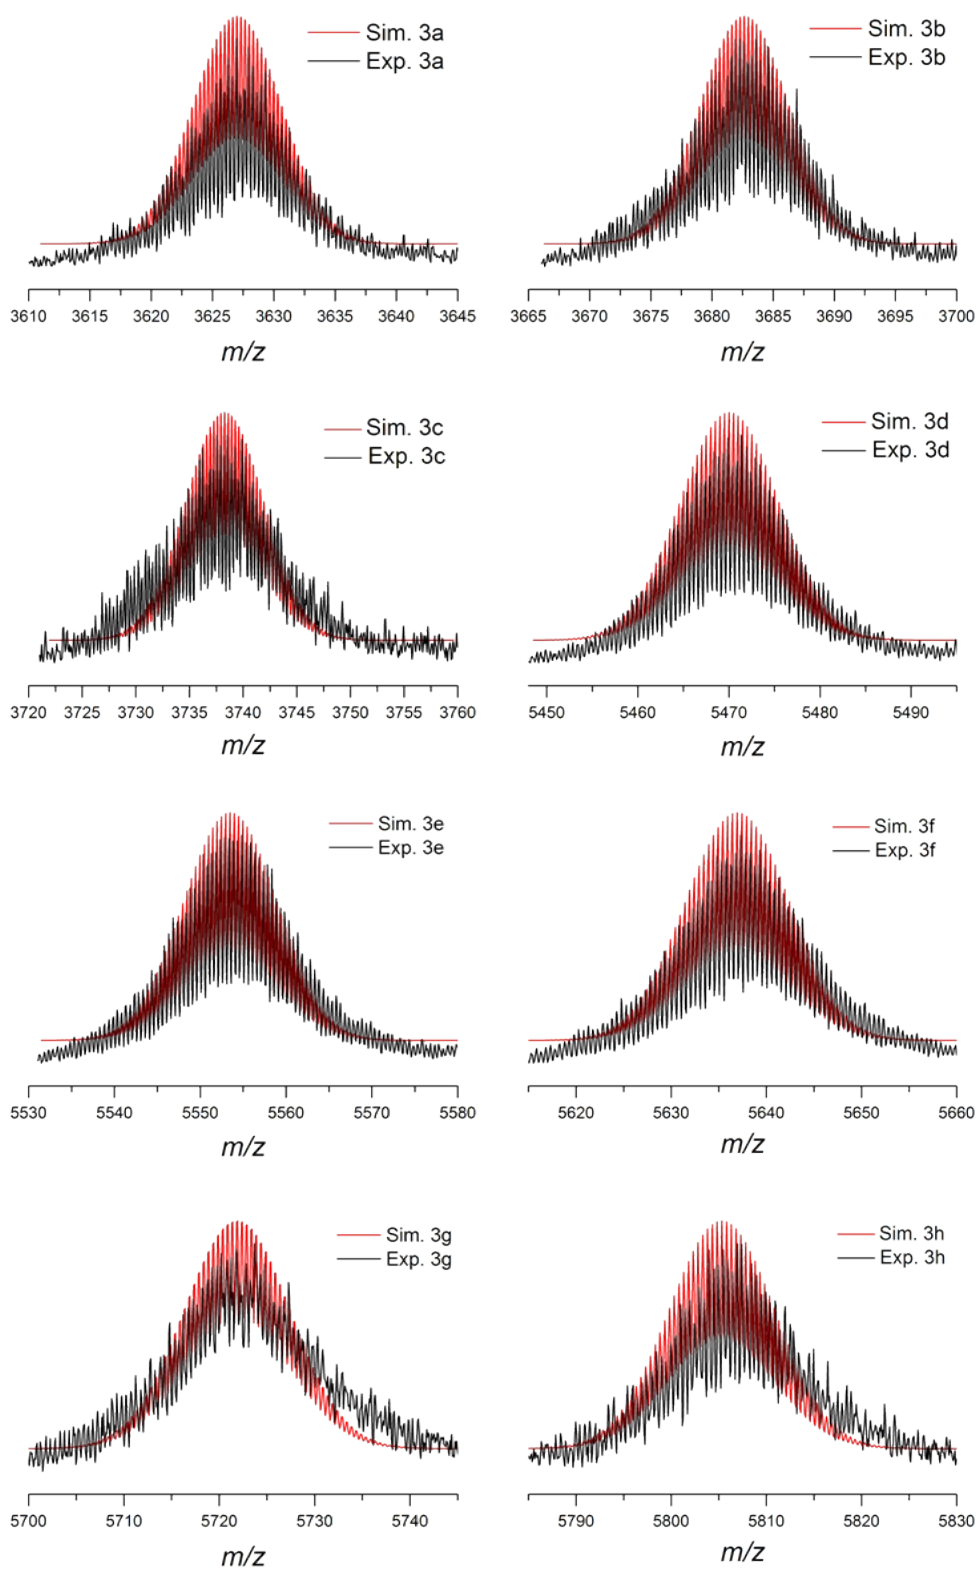

**Figure S9:** Energy gap ( $E_g$ ) obtained from UV-Vis spectrum.

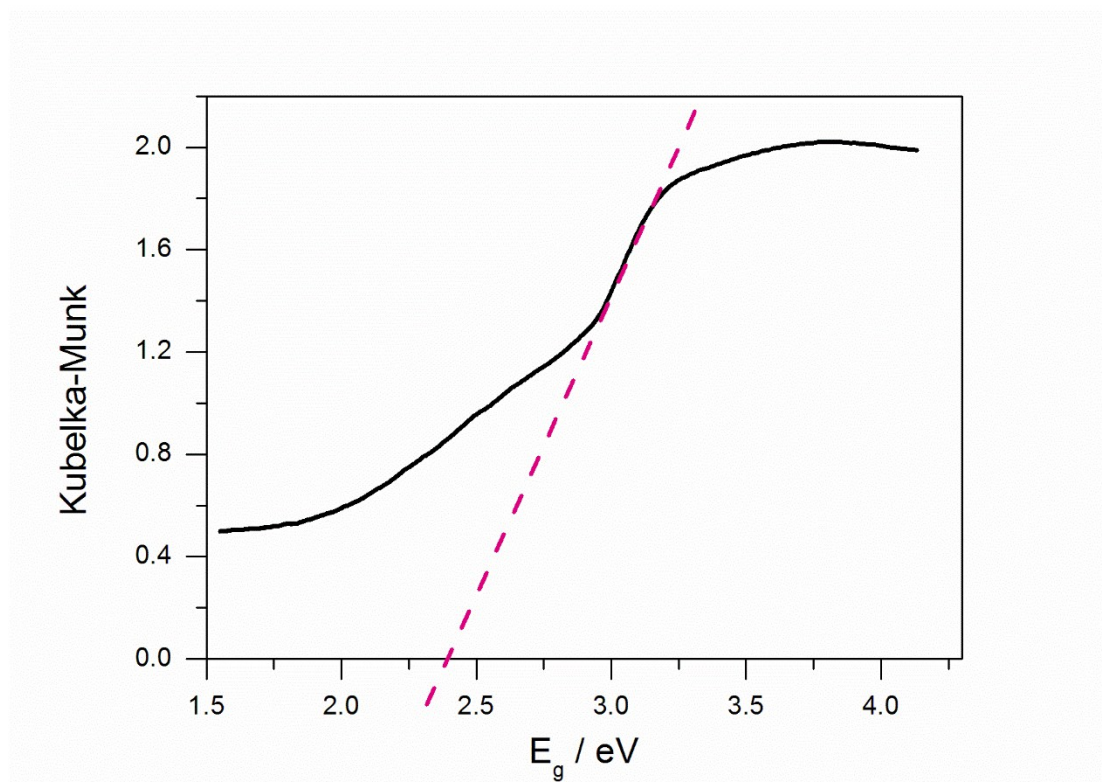

**Figure S10.** The plot of maximum of the intensities ( $I_{\max}$ ) against temperature shows a good linear relationship

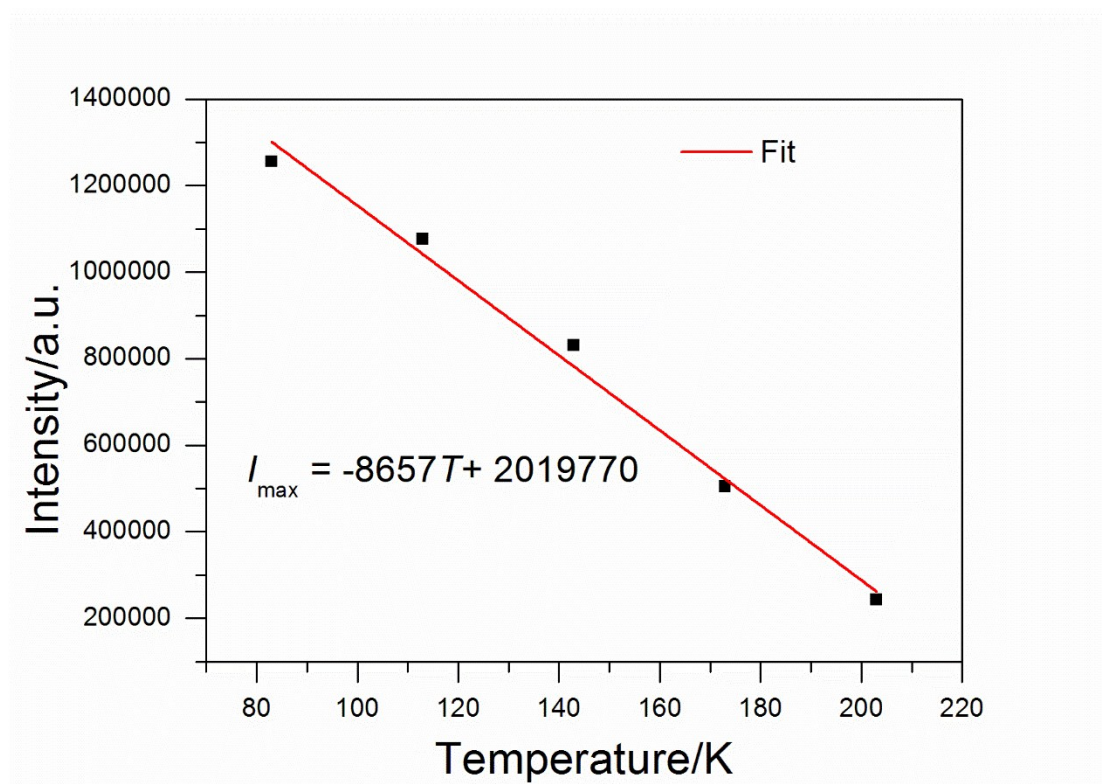

**Figure S11.** The emission at 83 K shows single-exponential behavior with life time  $\tau = 153 \mu\text{s}$ .

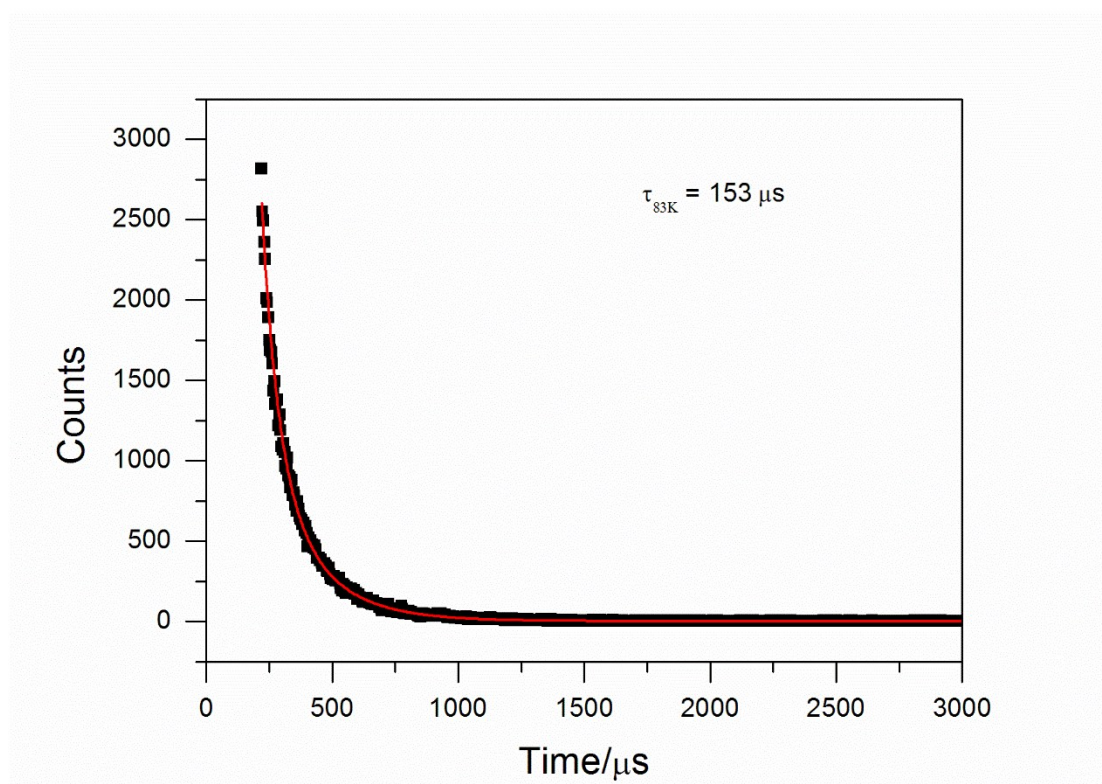



**Figure S12:** Comparison of observed and simulated PXRD patterns of SD/Ag66d.

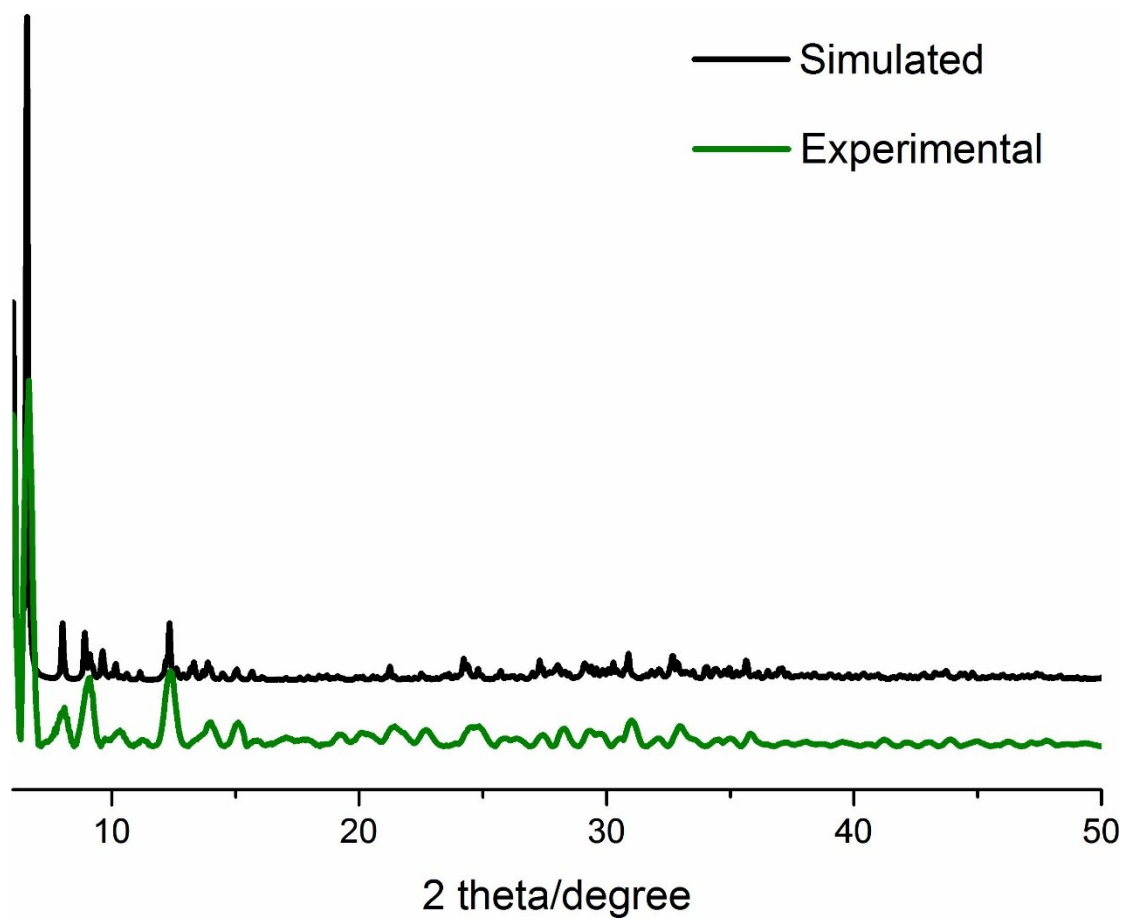

**Figure S13:** SEM and elemental mapping images of SD/Ag66d.

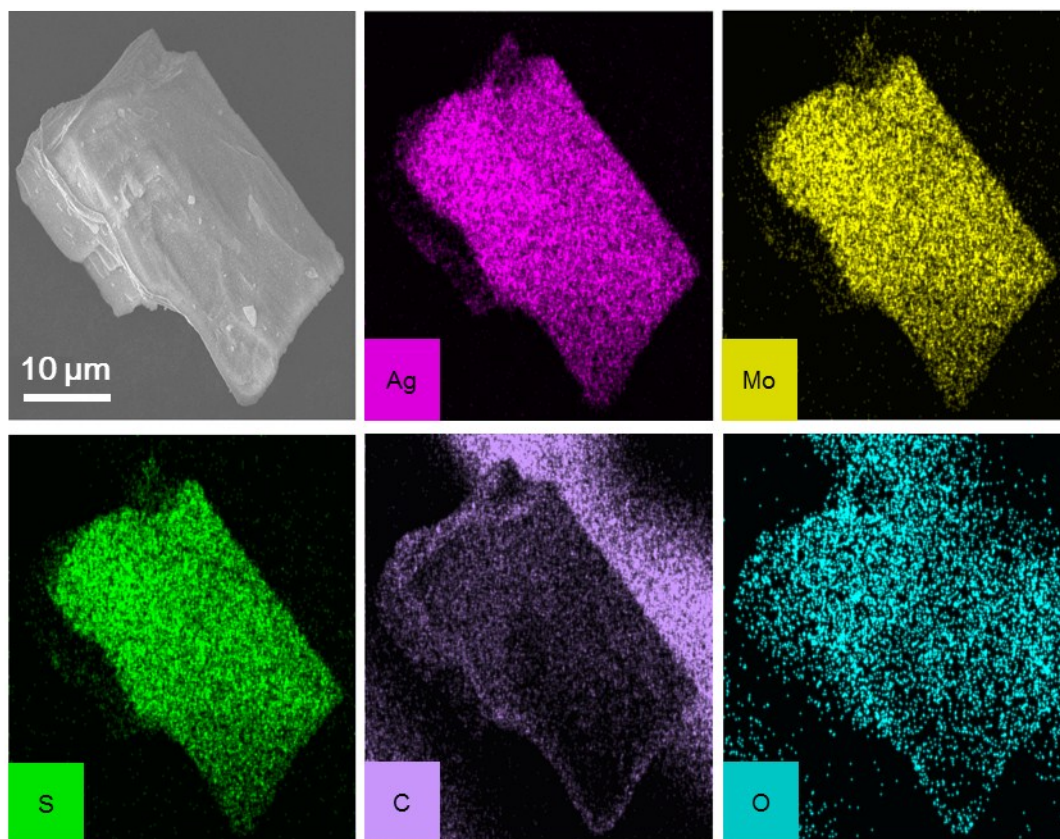

**Figure S14:** TGA curve of **SD/Ag66d**.

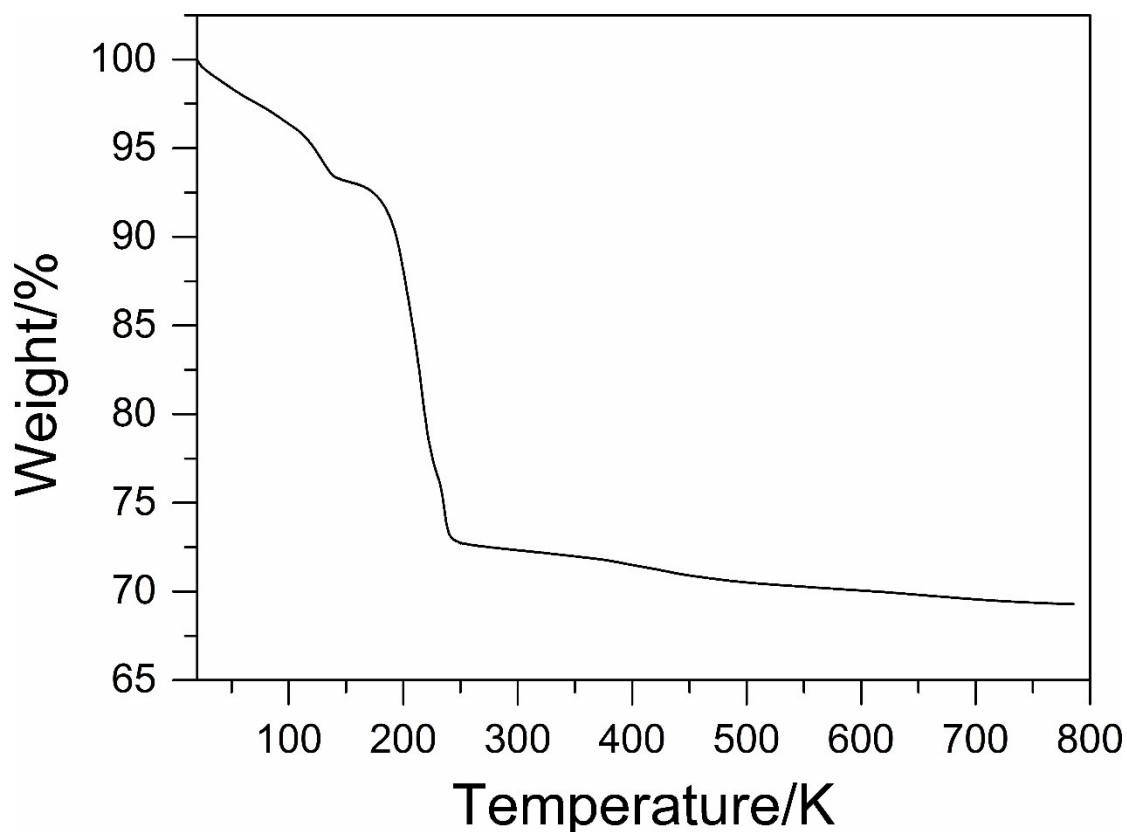

As shown in Fig. S14, we tested the thermal stability using TGA for **SD/Ag66d**. The result showed the **SD/Ag66d** quickly loses solvents even starting from room temperature. When heating to 135 °C, almost all solvents are removed. The main skeleton of cluster starts to decompose at 178 °C.

**Table S1:** The assigned formula of species found in ESI-MS of **SD/Ag66d** dissolved in CH<sub>2</sub>Cl<sub>2</sub>.

| Peaks for SD/Ag66d | Species                                                                                                                                                                                    | Exp. <i>m/z</i> | Sim. <i>m/z</i> |
|--------------------|--------------------------------------------------------------------------------------------------------------------------------------------------------------------------------------------|-----------------|-----------------|
| <b>3a</b>          | [Ag <sub>6</sub> @(MoO <sub>4</sub> ) <sub>9</sub> @Ag <sub>56</sub> ( <sup>i</sup> PrS) <sub>28</sub> (OAc) <sub>11</sub> ] <sup>3+</sup>                                                 | 3626.95         | 3626.99         |
| <b>3b</b>          | [Ag <sub>6</sub> @(MoO <sub>4</sub> ) <sub>9</sub> @Ag <sub>57</sub> ( <sup>i</sup> PrS) <sub>28</sub> (OAc) <sub>12</sub> ] <sup>3+</sup>                                                 | 3682.58         | 3682.63         |
| <b>3c</b>          | [Ag <sub>6</sub> @(MoO <sub>4</sub> ) <sub>9</sub> @Ag <sub>58</sub> ( <sup>i</sup> PrS) <sub>28</sub> (OAc) <sub>13</sub> ] <sup>3+</sup>                                                 | 3738.24         | 3738.27         |
| <b>3d</b>          | [Ag <sub>6</sub> @(MoO <sub>4</sub> ) <sub>9</sub> @Ag <sub>56</sub> ( <sup>i</sup> PrS) <sub>28</sub> (OAc) <sub>12</sub> ] <sup>2+</sup>                                                 | 5469.88         | 5469.99         |
| <b>3e</b>          | [Ag <sub>6</sub> @(MoO <sub>4</sub> ) <sub>9</sub> @Ag <sub>57</sub> ( <sup>i</sup> PrS) <sub>28</sub> (OAc) <sub>13</sub> ] <sup>2+</sup>                                                 | 5553.34         | 5553.45         |
| <b>3f</b>          | [Ag <sub>6</sub> @(MoO <sub>4</sub> ) <sub>9</sub> @Ag <sub>58</sub> ( <sup>i</sup> PrS) <sub>28</sub> (OAc) <sub>14</sub> ] <sup>2+</sup>                                                 | 5636.80         | 5636.91         |
| <b>3g</b>          | [Ag <sub>6</sub> @(MoO <sub>4</sub> ) <sub>9</sub> @Ag <sub>58</sub> ( <sup>i</sup> PrS) <sub>28</sub> (OAc) <sub>14</sub> (CH <sub>2</sub> Cl <sub>2</sub> ) <sub>2</sub> ] <sup>2+</sup> | 5721.80         | 5721.86         |
| <b>3h</b>          | [Ag <sub>6</sub> @(MoO <sub>4</sub> ) <sub>9</sub> @Ag <sub>59</sub> ( <sup>i</sup> PrS) <sub>28</sub> (OAc) <sub>15</sub> (CH <sub>2</sub> Cl <sub>2</sub> ) <sub>2</sub> ] <sup>2+</sup> | 5805.46         | 5805.32         |

**Table S2:** Crystal data collection and structure refinement for **SD/Ag66b-SD/Ag66d**.

| Compound                                    | <b>SD/Ag66b</b>                                                                                    | <b>SD/Ag66c</b>                                                                                        | <b>SD/Ag66d</b>                                                                                    |
|---------------------------------------------|----------------------------------------------------------------------------------------------------|--------------------------------------------------------------------------------------------------------|----------------------------------------------------------------------------------------------------|
| Empirical formula                           | C <sub>212</sub> H <sub>292</sub> Ag <sub>66</sub> Mo <sub>9</sub> O <sub>74</sub> S <sub>28</sub> | C <sub>234.5</sub> H <sub>339.5</sub> Ag <sub>66</sub> Mo <sub>9</sub> O <sub>71</sub> S <sub>28</sub> | C <sub>120</sub> H <sub>260</sub> Ag <sub>66</sub> Mo <sub>9</sub> O <sub>72</sub> S <sub>28</sub> |
| X-ray diffractometer                        | Rigaku Oxford Diffraction XtaLAB Synergy                                                           | Bruker APEX II                                                                                         | Bruker APEX II                                                                                     |
| Formula weight                              | 12905.00                                                                                           | 13175.10                                                                                               | 11735.82                                                                                           |
| Temperature/K                               | 100.00(13)                                                                                         | 173(2)                                                                                                 | 100(2)                                                                                             |
| Crystal system                              | triclinic                                                                                          | monoclinic                                                                                             | orthorhombic                                                                                       |
| Space group                                 | P-1                                                                                                | P2 <sub>1</sub> /c                                                                                     | Pnnm                                                                                               |
| a/Å                                         | 16.3935(2)                                                                                         | 17.8507(15)                                                                                            | 19.780(2)                                                                                          |
| b/Å                                         | 23.8317(3)                                                                                         | 46.314(4)                                                                                              | 21.915(3)                                                                                          |
| c/Å                                         | 24.0155(3)                                                                                         | 44.484(4)                                                                                              | 33.362(4)                                                                                          |
| $\alpha$ /°                                 | 112.6803(13)                                                                                       | 90                                                                                                     | 90                                                                                                 |
| $\beta$ /°                                  | 108.2811(12)                                                                                       | 99.760(2)                                                                                              | 90                                                                                                 |
| $\gamma$ /°                                 | 99.7127(12)                                                                                        | 90                                                                                                     | 90                                                                                                 |
| Volume/Å <sup>3</sup>                       | 7757.8(2)                                                                                          | 36244(5)                                                                                               | 14462(3)                                                                                           |
| Z                                           | 1                                                                                                  | 4                                                                                                      | 2                                                                                                  |
| $\rho_{\text{calc}}$ /cm <sup>3</sup>       | 2.762                                                                                              | 2.415                                                                                                  | 2.695                                                                                              |
| $\mu$ /mm <sup>-1</sup>                     | 4.654                                                                                              | 3.987                                                                                                  | 4.978                                                                                              |
| F(000)                                      | 6084.0                                                                                             | 24970.0                                                                                                | 10968.0                                                                                            |
| Radiation                                   | MoK $\alpha$ ( $\lambda$ = 0.71073)                                                                | MoK $\alpha$ ( $\lambda$ = 0.71073)                                                                    | MoK $\alpha$ ( $\lambda$ = 0.71073)                                                                |
| Reflections collected                       | 102945                                                                                             | 216447                                                                                                 | 99413                                                                                              |
| Independent reflections                     | 31603 [R <sub>int</sub> = 0.0472, R <sub>sigma</sub> = 0.0484]                                     | 63713 [R <sub>int</sub> = 0.0496, R <sub>sigma</sub> = 0.0585]                                         | 12945 [R <sub>int</sub> = 0.0518, R <sub>sigma</sub> = 0.0300]                                     |
| Data/parameters                             | 31603/2013                                                                                         | 63713/3351                                                                                             | 12945/759                                                                                          |
| Goodness-of-fit on F <sup>2</sup>           | 1.092                                                                                              | 1.030                                                                                                  | 1.865                                                                                              |
| Final R indexes [I >= 2 $\sigma$ (I)]       | R <sub>1</sub> = 0.0601, wR <sub>2</sub> = 0.1211                                                  | R <sub>1</sub> = 0.0836, wR <sub>2</sub> = 0.1957                                                      | R <sub>1</sub> = 0.1224, wR <sub>2</sub> = 0.3601                                                  |
| Final R indexes [all data]                  | R <sub>1</sub> = 0.0780, wR <sub>2</sub> = 0.1286                                                  | R <sub>1</sub> = 0.1338, wR <sub>2</sub> = 0.2306                                                      | R <sub>1</sub> = 0.1544, wR <sub>2</sub> = 0.4344                                                  |
| Largest diff. peak/hole / e Å <sup>-3</sup> | 2.95/-3.48                                                                                         | 3.62/-2.01                                                                                             | 7.02/-4.61                                                                                         |

**Table 3:** Selected bond distances (Å) and angles (°) for **SD/Ag66b-SD/Ag66d**.

| <b>SD/Ag66b</b>       |             |           |             |
|-----------------------|-------------|-----------|-------------|
| Ag1—Ag2               | 2.693 (3)   | Ag16—S11  | 2.558 (4)   |
| Ag1—Ag2 <sup>i</sup>  | 2.855 (3)   | Ag16—S12  | 2.585 (3)   |
| Ag1—Ag10              | 2.708 (3)   | Ag16—O24  | 2.402 (9)   |
| Ag1—Ag10 <sup>i</sup> | 2.798 (3)   | Ag16—O25  | 2.321 (10)  |
| Ag1—Ag31              | 3.330 (2)   | Ag17—S13  | 2.533 (3)   |
| Ag1—O2 <sup>i</sup>   | 2.316 (7)   | Ag17—O5   | 2.508 (7)   |
| Ag1—O10               | 2.376 (8)   | Ag17—O19  | 1.950 (7)   |
| Ag2—Ag1 <sup>i</sup>  | 2.855 (3)   | Ag18—S8   | 2.534 (3)   |
| Ag2—Ag10              | 2.8306 (13) | Ag18—S11  | 2.463 (3)   |
| Ag2—Ag10 <sup>i</sup> | 2.6998 (13) | Ag18—O13  | 2.464 (8)   |
| Ag2—O4                | 2.377 (7)   | Ag18—O26  | 2.477 (8)   |
| Ag2—O7                | 2.352 (7)   | Ag19—Ag20 | 2.8112 (13) |
| Ag2—O9                | 2.587 (7)   | Ag19—Ag23 | 2.9102 (13) |
| Ag3—Ag5 <sup>i</sup>  | 3.332 (6)   | Ag19—S9   | 2.518 (3)   |
| Ag3—Ag6 <sup>i</sup>  | 3.159 (4)   | Ag19—S12  | 2.484 (3)   |
| Ag3—Ag11              | 3.019 (2)   | Ag19—O13  | 2.393 (8)   |
| Ag3—Ag17              | 2.659 (4)   | Ag19—O26  | 2.527 (8)   |
| Ag3—S1 <sup>i</sup>   | 2.587 (3)   | Ag20—Ag21 | 2.8153 (13) |
| Ag3—S13               | 2.468 (4)   | Ag20—Ag24 | 3.1530 (12) |
| Ag3—O3                | 2.224 (9)   | Ag20—Ag25 | 2.9551 (12) |
| Ag4—Ag12              | 2.974 (3)   | Ag20—S9   | 2.570 (3)   |
| Ag4—Ag17              | 2.973 (4)   | Ag20—O16  | 2.474 (7)   |
| Ag4—S11               | 2.413 (4)   | Ag20—O29  | 2.166 (7)   |
| Ag4—S13               | 2.611 (4)   | Ag21—Ag22 | 3.1890 (13) |
| Ag4—O23               | 2.440 (10)  | Ag21—S6   | 2.526 (3)   |
| Ag5—Ag8 <sup>i</sup>  | 3.341 (4)   | Ag21—S9   | 2.586 (3)   |
| Ag5—Ag17 <sup>i</sup> | 2.847 (2)   | Ag21—O18  | 2.422 (8)   |
| Ag5—Ag28              | 2.940 (2)   | Ag21—O33  | 2.380 (8)   |
| Ag5—Ag29              | 2.846 (2)   | Ag22—Ag23 | 2.8496 (12) |
| Ag5—S1                | 2.425 (3)   | Ag22—Ag32 | 3.1659 (12) |
| Ag5—S10 <sup>i</sup>  | 2.515 (4)   | Ag22—Ag33 | 3.1015 (12) |
| Ag5—O5 <sup>i</sup>   | 2.258 (10)  | Ag22—S7   | 2.498 (3)   |
| Ag6—Ag30              | 3.3164 (19) | Ag22—S9   | 2.656 (3)   |
| Ag6—S1                | 2.536 (3)   | Ag22—O28  | 2.269 (7)   |
| Ag6—S4                | 2.569 (3)   | Ag22—O33  | 2.502 (9)   |
| Ag7—Ag21              | 3.0118 (19) | Ag23—Ag33 | 2.9538 (12) |
| Ag7—Ag27              | 3.358 (3)   | Ag23—S8   | 2.526 (3)   |
| Ag7—S4                | 2.603 (4)   | Ag23—S9   | 2.644 (3)   |
| Ag7—S6                | 2.478 (3)   | Ag23—O27  | 2.292 (7)   |

|                        |             |                       |             |
|------------------------|-------------|-----------------------|-------------|
| Ag7—O35                | 2.49 (2)    | Ag24—Ag25             | 3.3313 (12) |
| Ag8—Ag5 <sup>i</sup>   | 3.342 (4)   | Ag24—S5               | 2.395 (3)   |
| Ag8—Ag17               | 3.182 (3)   | Ag24—S12              | 2.410 (3)   |
| Ag8—Ag18               | 3.023 (3)   | Ag25—Ag26             | 3.0076 (12) |
| Ag8—S10                | 2.604 (6)   | Ag25—Ag27             | 3.1382 (12) |
| Ag8—S11                | 2.304 (5)   | Ag25—S5               | 2.483 (3)   |
| Ag8—O20                | 2.387 (10)  | Ag25—S6               | 2.460 (3)   |
| Ag9—Ag33               | 3.084 (11)  | Ag25—O30              | 2.412 (8)   |
| Ag9—S8                 | 2.392 (11)  | Ag26—Ag27             | 3.1627 (12) |
| Ag9—S10                | 2.623 (12)  | Ag26—S2               | 2.454 (3)   |
| Ag9—O7                 | 2.319 (14)  | Ag26—S5               | 2.482 (3)   |
| Ag9—O9                 | 2.497 (11)  | Ag26—O17              | 2.332 (7)   |
| Ag10—Ag14              | 3.3569 (11) | Ag27—Ag28             | 3.0342 (12) |
| Ag10—O11 <sup>i</sup>  | 2.429 (7)   | Ag27—S2               | 2.533 (3)   |
| Ag10—O14               | 2.329 (7)   | Ag27—S6               | 2.482 (3)   |
| Ag10—O17               | 2.499 (7)   | Ag27—O31              | 2.501 (8)   |
| Ag11—Ag12              | 2.8602 (13) | Ag28—Ag29             | 3.1031 (13) |
| Ag11—Ag13              | 3.0932 (11) | Ag28—S1               | 2.505 (3)   |
| Ag11—Ag30 <sup>i</sup> | 3.2824 (12) | Ag28—S2               | 2.549 (3)   |
| Ag11—S3 <sup>i</sup>   | 2.553 (3)   | Ag28—O32              | 2.361 (9)   |
| Ag11—S13               | 2.586 (3)   | Ag29—S2               | 2.452 (4)   |
| Ag11—O22               | 2.294 (8)   | Ag29—S10 <sup>i</sup> | 2.498 (4)   |
| Ag11—O36 <sup>i</sup>  | 2.427 (16)  | Ag29—O4 <sup>i</sup>  | 2.337 (7)   |
| Ag12—Ag13              | 2.9071 (12) | Ag29—O9 <sup>i</sup>  | 2.494 (7)   |
| Ag12—S13               | 2.668 (3)   | Ag30—Ag31             | 3.0254 (11) |
| Ag12—S14               | 2.532 (3)   | Ag30—Ag32             | 3.0090 (12) |
| Ag12—O21               | 2.272 (8)   | Ag30—S3               | 2.502 (3)   |
| Ag13—Ag14              | 2.9799 (11) | Ag30—S4               | 2.463 (3)   |
| Ag13—S3 <sup>i</sup>   | 2.429 (3)   | Ag30—O3 <sup>i</sup>  | 2.487 (8)   |
| Ag13—S14               | 2.447 (3)   | Ag30—O36              | 2.341 (18)  |
| Ag13—O6                | 2.321 (7)   | Ag31—Ag32             | 2.9270 (12) |
| Ag14—Ag24              | 3.3094 (14) | Ag31—S3               | 2.481 (3)   |
| Ag14—S5                | 2.717 (3)   | Ag31—S7               | 2.533 (3)   |
| Ag14—S14               | 2.465 (3)   | Ag31—O2 <sup>i</sup>  | 2.375 (7)   |
| Ag14—O11 <sup>i</sup>  | 2.290 (7)   | Ag31—O10              | 2.384 (8)   |
| Ag14—O14               | 2.400 (7)   | Ag32—S4               | 2.464 (3)   |
| Ag15—Ag16              | 2.9194 (14) | Ag32—S7               | 2.481 (3)   |
| Ag15—Ag24              | 2.9457 (13) | Ag32—O18              | 2.529 (7)   |
| Ag15—S12               | 2.460 (3)   | Ag32—O33              | 2.592 (10)  |
| Ag15—S14               | 2.546 (3)   | Ag33—S7               | 2.467 (3)   |
| Ag15—O8                | 2.406 (7)   | Ag33—S8               | 2.449 (3)   |
| Ag15—O23               | 2.362 (8)   | Ag33—O15              | 2.299 (7)   |
| Ag16—Ag18              | 2.9849 (14) |                       |             |

|                                        |             |                                        |             |
|----------------------------------------|-------------|----------------------------------------|-------------|
| O2 <sup>i</sup> —Ag1—O10               | 91.1 (3)    | O13—Ag18—O26                           | 88.8 (3)    |
| O4—Ag2—O9                              | 84.2 (2)    | O26—Ag18—S8                            | 87.1 (2)    |
| O7—Ag2—O4                              | 82.5 (2)    | S9—Ag19—O26                            | 104.4 (2)   |
| O7—Ag2—O9                              | 81.0 (2)    | S12—Ag19—S9                            | 143.94 (10) |
| S13—Ag3—S1 <sup>i</sup>                | 142.12 (17) | S12—Ag19—O26                           | 105.2 (2)   |
| O3—Ag3—S1 <sup>i</sup>                 | 85.3 (2)    | O13—Ag19—S9                            | 114.89 (19) |
| O3—Ag3—S13                             | 117.8 (3)   | O13—Ag19—S12                           | 85.64 (19)  |
| S11—Ag4—S13                            | 148.6 (2)   | O13—Ag19—O26                           | 89.2 (3)    |
| S11—Ag4—O23                            | 105.3 (3)   | O16—Ag20—S9                            | 83.49 (17)  |
| O23—Ag4—S13                            | 105.9 (2)   | O29—Ag20—S9                            | 139.7 (2)   |
| S1—Ag5—S10 <sup>i</sup>                | 157.7 (3)   | O29—Ag20—O16                           | 130.2 (3)   |
| O5 <sup>i</sup> —Ag5—S1                | 109.7 (3)   | S6—Ag21—S9                             | 142.09 (9)  |
| O5 <sup>i</sup> —Ag5—S10 <sup>i</sup>  | 92.6 (2)    | O18—Ag21—S6                            | 87.4 (2)    |
| S1—Ag6—S4                              | 144.84 (11) | O18—Ag21—S9                            | 104.0 (2)   |
| S6—Ag7—S4                              | 154.4 (2)   | O33—Ag21—S6                            | 122.1 (3)   |
| S6—Ag7—O35                             | 108.9 (5)   | O33—Ag21—S9                            | 95.2 (3)    |
| O35—Ag7—S4                             | 86.4 (5)    | O33—Ag21—O18                           | 84.4 (3)    |
| S11—Ag8—S10                            | 159.7 (3)   | S7—Ag22—S9                             | 141.94 (9)  |
| S11—Ag8—O20                            | 93.9 (3)    | S7—Ag22—O33                            | 101.9 (2)   |
| O20—Ag8—S10                            | 105.58 (19) | O28—Ag22—S7                            | 118.3 (2)   |
| S8—Ag9—S10                             | 123.9 (4)   | O28—Ag22—S9                            | 95.2 (2)    |
| S8—Ag9—O9                              | 140.8 (5)   | O28—Ag22—O33                           | 96.6 (3)    |
| O7—Ag9—S8                              | 113.7 (5)   | O33—Ag22—S9                            | 90.7 (2)    |
| O7—Ag9—S10                             | 93.5 (4)    | S8—Ag23—S9                             | 142.56 (9)  |
| O7—Ag9—O9                              | 83.6 (4)    | O27—Ag23—S8                            | 110.8 (2)   |
| O9—Ag9—S10                             | 87.6 (4)    | O27—Ag23—S9                            | 104.2 (2)   |
| O11 <sup>i</sup> —Ag10—O17             | 83.5 (2)    | S5—Ag24—S12                            | 168.89 (11) |
| O14—Ag10—O11 <sup>i</sup>              | 86.9 (2)    | S6—Ag25—S5                             | 158.98 (10) |
| O14—Ag10—O17                           | 83.3 (2)    | O30—Ag25—S5                            | 104.66 (19) |
| S3 <sup>i</sup> —Ag11—S13              | 139.79 (9)  | O30—Ag25—S6                            | 96.11 (19)  |
| O22—Ag11—S3 <sup>i</sup>               | 103.4 (3)   | S2—Ag26—S5                             | 142.60 (10) |
| O22—Ag11—S13                           | 110.4 (3)   | O17—Ag26—S2                            | 105.54 (18) |
| O22—Ag11—O36 <sup>i</sup>              | 105.6 (6)   | O17—Ag26—S5                            | 106.23 (19) |
| O36 <sup>i</sup> —Ag11—S3 <sup>i</sup> | 91.6 (4)    | S6—Ag27—S2                             | 151.60 (9)  |
| O36 <sup>i</sup> —Ag11—S13             | 99.6 (5)    | S6—Ag27—O31                            | 103.9 (2)   |
| S14—Ag12—S13                           | 144.12 (9)  | O31—Ag27—S2                            | 104.0 (2)   |
| O21—Ag12—S13                           | 95.0 (2)    | S1—Ag28—S2                             | 154.45 (10) |
| O21—Ag12—S14                           | 118.6 (2)   | O32—Ag28—S1                            | 106.3 (2)   |
| S3 <sup>i</sup> —Ag13—S14              | 149.07 (9)  | O32—Ag28—S2                            | 98.2 (3)    |
| O6—Ag13—S3 <sup>i</sup>                | 100.5 (2)   | S2—Ag29—S10 <sup>i</sup>               | 139.57 (10) |
| O6—Ag13—S14                            | 109.2 (2)   | S2—Ag29—O9 <sup>i</sup>                | 116.15 (18) |
| S14—Ag14—S5                            | 112.23 (9)  | O4 <sup>i</sup> —Ag29—S2               | 105.52 (19) |
| O11 <sup>i</sup> —Ag14—S5              | 88.7 (2)    | O4 <sup>i</sup> —Ag29—S10 <sup>i</sup> | 105.60 (19) |



|                                         |             |                                        |             |
|-----------------------------------------|-------------|----------------------------------------|-------------|
| O11 <sup>i</sup> —Ag14—S14              | 154.8 (2)   | O4 <sup>i</sup> —Ag29—O9 <sup>i</sup>  | 87.2 (2)    |
| O11 <sup>i</sup> —Ag14—O14              | 88.5 (2)    | O9 <sup>i</sup> —Ag29—S10 <sup>i</sup> | 90.52 (19)  |
| O14—Ag14—S5                             | 90.98 (18)  | S4—Ag30—S3                             | 159.41 (9)  |
| O14—Ag14—S14                            | 104.42 (17) | S4—Ag30—O3 <sup>i</sup>                | 99.3 (2)    |
| S12—Ag15—S14                            | 139.56 (10) | O3 <sup>i</sup> —Ag30—S3               | 88.1 (2)    |
| O8—Ag15—S12                             | 115.2 (2)   | O36—Ag30—S3                            | 95.0 (4)    |
| O8—Ag15—S14                             | 81.8 (2)    | O36—Ag30—S4                            | 104.6 (4)   |
| O23—Ag15—S12                            | 123.4 (2)   | O36—Ag30—O3 <sup>i</sup>               | 86.7 (5)    |
| O23—Ag15—S14                            | 90.4 (2)    | S3—Ag31—S7                             | 138.07 (9)  |
| O23—Ag15—O8                             | 91.5 (3)    | O2 <sup>i</sup> —Ag31—S3               | 107.90 (18) |
| S11—Ag16—S12                            | 137.16 (10) | O2 <sup>i</sup> —Ag31—S7               | 105.42 (19) |
| O24—Ag16—S11                            | 99.8 (3)    | O2 <sup>i</sup> —Ag31—O10              | 89.5 (2)    |
| O24—Ag16—S12                            | 100.2 (3)   | O10—Ag31—S3                            | 109.4 (2)   |
| O25—Ag16—S11                            | 112.6 (3)   | O10—Ag31—S7                            | 95.5 (2)    |
| O25—Ag16—S12                            | 94.1 (3)    | S4—Ag32—S7                             | 164.19 (10) |
| O25—Ag16—O24                            | 112.2 (3)   | S4—Ag32—O18                            | 100.4 (2)   |
| O5—Ag17—S13                             | 81.7 (2)    | S4—Ag32—O33                            | 94.4 (2)    |
| O19—Ag17—S13                            | 148.2 (2)   | S7—Ag32—O18                            | 89.25 (19)  |
| O19—Ag17—O5                             | 129.7 (3)   | S7—Ag32—O33                            | 99.9 (2)    |
| S11—Ag18—S8                             | 149.83 (11) | O18—Ag32—O33                           | 78.1 (3)    |
| S11—Ag18—O13                            | 112.21 (19) | S8—Ag33—S7                             | 142.91 (9)  |
| S11—Ag18—O26                            | 119.3 (2)   | O15—Ag33—S7                            | 100.51 (19) |
| O13—Ag18—S8                             | 80.40 (18)  | O15—Ag33—S8                            | 115.20 (19) |
| Symmetry code: (i) $-x+2, -y+1, -z+1$ . |             |                                        |             |
| <b>SD/Ag66c</b>                         |             |                                        |             |
| Ag1—Ag2                                 | 2.727 (9)   | Ag33—S11                               | 2.487 (4)   |
| Ag1—Ag4                                 | 2.783 (8)   | Ag33—S19                               | 2.507 (4)   |
| Ag1—O27                                 | 2.414 (11)  | Ag34—Ag51                              | 3.087 (2)   |
| Ag1—O30                                 | 2.442 (10)  | Ag34—O54                               | 2.330 (12)  |
| Ag2—Ag3                                 | 2.802 (9)   | Ag34—O62                               | 2.334 (11)  |
| Ag2—Ag6                                 | 2.694 (10)  | Ag34—S11                               | 2.619 (5)   |
| Ag2—O6                                  | 2.51 (3)    | Ag34—S18                               | 2.602 (5)   |
| Ag2—O11                                 | 2.240 (13)  | Ag35—Ag36                              | 2.861 (2)   |
| Ag3—Ag4                                 | 2.711 (8)   | Ag35—Ag52                              | 2.919 (2)   |
| Ag3—O7                                  | 2.46 (2)    | Ag35—O31                               | 2.339 (11)  |
| Ag3—O18                                 | 2.274 (12)  | Ag35—S10                               | 2.517 (4)   |
| Ag3—O22                                 | 2.514 (11)  | Ag35—S18                               | 2.504 (5)   |
| Ag4—Ag5                                 | 2.740 (8)   | Ag36—Ag37                              | 2.871 (2)   |
| Ag4—Ag6                                 | 2.818 (9)   | Ag36—O28                               | 2.461 (10)  |
| Ag4—O25                                 | 2.208 (12)  | Ag36—O63                               | 2.138 (17)  |
| Ag5—Ag6                                 | 2.637 (7)   | Ag36—S10                               | 2.535 (5)   |
| Ag5—O15                                 | 2.483 (12)  | Ag37—Ag38                              | 2.996 (2)   |
| Ag5—O17                                 | 2.353 (11)  | Ag37—Ag53                              | 3.126 (2)   |

|           |            |           |            |
|-----------|------------|-----------|------------|
| Ag6—O12   | 2.499 (12) | Ag37—O26  | 2.449 (10) |
| Ag6—O36   | 2.279 (12) | Ag37—O49  | 2.280 (17) |
| Ag7—Ag8   | 3.326 (11) | Ag37—S10  | 2.721 (5)  |
| Ag7—Ag15  | 3.294 (9)  | Ag37—S17  | 2.481 (5)  |
| Ag7—Ag27  | 2.993 (10) | Ag38—Ag39 | 2.939 (2)  |
| Ag7—Ag28  | 3.057 (9)  | Ag38—Ag54 | 3.242 (3)  |
| Ag7—S21   | 2.512 (9)  | Ag38—O50  | 2.332 (15) |
| Ag7—S28   | 2.546 (10) | Ag38—O65  | 2.418 (17) |
| Ag8—Ag27  | 3.370 (3)  | Ag38—S9   | 2.778 (5)  |
| Ag8—O1    | 2.51 (3)   | Ag38—S17  | 2.673 (5)  |
| Ag8—O15   | 2.405 (11) | Ag39—Ag40 | 2.825 (3)  |
| Ag8—S22   | 2.451 (7)  | Ag39—O24  | 2.431 (10) |
| Ag8—S28   | 2.491 (6)  | Ag39—O66  | 2.265 (19) |
| Ag9—Ag15  | 3.120 (2)  | Ag39—S9   | 2.524 (5)  |
| Ag9—Ag16  | 2.969 (3)  | Ag39—S16  | 2.754 (5)  |
| Ag9—O1    | 2.58 (3)   | Ag40—Ag41 | 2.927 (2)  |
| Ag9—O12   | 2.334 (11) | Ag40—Ag55 | 2.935 (2)  |
| Ag9—S27   | 2.445 (5)  | Ag40—O23  | 2.566 (10) |
| Ag9—S28   | 2.484 (6)  | Ag40—O48  | 2.169 (15) |
| Ag10—Ag11 | 3.071 (2)  | Ag40—S16  | 2.536 (5)  |
| Ag10—Ag17 | 3.253 (2)  | Ag41—Ag56 | 3.339 (2)  |
| Ag10—Ag18 | 2.967 (2)  | Ag41—O19  | 2.390 (11) |
| Ag10—O36  | 2.319 (9)  | Ag41—S8   | 2.495 (5)  |
| Ag10—S26  | 2.440 (5)  | Ag41—S16  | 2.502 (5)  |
| Ag10—S27  | 2.446 (5)  | Ag42—Ag57 | 3.006 (2)  |
| Ag11—Ag20 | 3.095 (2)  | Ag42—O46  | 2.339 (13) |
| Ag11—O2   | 2.28 (3)   | Ag42—O70  | 2.357 (14) |
| Ag11—O29  | 2.396 (10) | Ag42—S8   | 2.591 (5)  |
| Ag11—S25  | 2.566 (5)  | Ag42—S15  | 2.601 (5)  |
| Ag11—S26  | 2.482 (5)  | Ag43—Ag44 | 3.076 (3)  |
| Ag12—Ag21 | 3.101 (2)  | Ag43—Ag58 | 2.956 (2)  |
| Ag12—Ag22 | 2.978 (2)  | Ag43—O20  | 2.426 (10) |
| Ag12—O25  | 2.362 (11) | Ag43—S14  | 2.464 (5)  |
| Ag12—S24  | 2.460 (6)  | Ag43—S15  | 2.478 (5)  |
| Ag12—S25  | 2.469 (5)  | Ag44—Ag45 | 2.906 (5)  |
| Ag13—Ag14 | 3.160 (2)  | Ag44—O14  | 2.566 (11) |
| Ag13—Ag23 | 3.075 (2)  | Ag44—O71  | 2.30 (3)   |
| Ag13—Ag24 | 3.014 (2)  | Ag44—S14  | 2.464 (6)  |
| Ag13—O21  | 2.336 (10) | Ag45—Ag46 | 3.133 (4)  |
| Ag13—S23  | 2.453 (5)  | Ag45—Ag59 | 3.327 (3)  |
| Ag13—S24  | 2.483 (5)  | Ag45—O13  | 2.428 (12) |
| Ag14—Ag26 | 3.041 (3)  | Ag45—O41  | 2.55 (2)   |
| Ag14—O3   | 2.31 (3)   | Ag45—O42  | 2.33 (3)   |

|           |             |           |            |
|-----------|-------------|-----------|------------|
| Ag14—O17  | 2.368 (11)  | Ag45—S21  | 2.499 (6)  |
| Ag14—S22  | 2.584 (6)   | Ag46—Ag47 | 3.133 (3)  |
| Ag14—S23  | 2.501 (5)   | Ag46—Ag59 | 3.346 (3)  |
| Ag15—Ag16 | 3.083 (3)   | Ag46—Ag60 | 2.904 (3)  |
| Ag15—Ag29 | 3.352 (3)   | Ag46—O13  | 2.547 (11) |
| Ag15—O10  | 2.559 (11)  | Ag46—S2   | 2.439 (6)  |
| Ag15—O40  | 2.55 (2)    | Ag46—S13  | 2.400 (6)  |
| Ag15—S20  | 2.442 (6)   | Ag47—Ag48 | 3.090 (3)  |
| Ag15—S28  | 2.502 (6)   | Ag47—Ag60 | 3.326 (3)  |
| Ag16—Ag17 | 3.275 (2)   | Ag47—O37  | 2.53 (3)   |
| Ag16—Ag30 | 3.183 (3)   | Ag47—S3   | 2.528 (7)  |
| Ag16—Ag31 | 3.356 (3)   | Ag47—S13  | 2.441 (7)  |
| Ag16—S20  | 2.465 (5)   | Ag48—Ag49 | 2.943 (3)  |
| Ag16—S27  | 2.502 (5)   | Ag48—Ag61 | 2.902 (3)  |
| Ag17—Ag18 | 2.887 (2)   | Ag48—S3   | 2.445 (5)  |
| Ag17—Ag31 | 2.998 (2)   | Ag48—S12  | 2.460 (5)  |
| Ag17—O58  | 2.50 (2)    | Ag49—Ag50 | 3.168 (2)  |
| Ag17—O59  | 2.324 (14)  | Ag49—Ag61 | 3.132 (3)  |
| Ag17—S19  | 2.583 (5)   | Ag49—O56  | 2.31 (2)   |
| Ag17—S27  | 2.585 (6)   | Ag49—S4   | 2.492 (5)  |
| Ag18—Ag33 | 2.937 (2)   | Ag49—S12  | 2.555 (5)  |
| Ag18—O60  | 2.286 (12)  | Ag50—Ag51 | 2.979 (2)  |
| Ag18—O61  | 2.574 (11)  | Ag50—Ag62 | 3.076 (3)  |
| Ag18—S19  | 2.604 (5)   | Ag50—O33  | 2.541 (11) |
| Ag18—S26  | 2.505 (5)   | Ag50—S4   | 2.456 (6)  |
| Ag19—Ag20 | 2.977 (2)   | Ag50—S11  | 2.435 (5)  |
| Ag19—Ag34 | 2.9702 (18) | Ag51—O31  | 2.482 (10) |
| Ag19—O32  | 2.482 (11)  | Ag51—O53  | 2.354 (13) |
| Ag19—O61  | 2.336 (12)  | Ag51—S5   | 2.562 (5)  |
| Ag19—S18  | 2.482 (4)   | Ag51—S11  | 2.487 (4)  |
| Ag19—S26  | 2.548 (4)   | Ag52—Ag53 | 2.861 (2)  |
| Ag20—Ag21 | 3.144 (2)   | Ag52—Ag63 | 3.039 (2)  |
| Ag20—Ag36 | 3.300 (2)   | Ag52—O52  | 2.271 (13) |
| Ag20—O28  | 2.581 (11)  | Ag52—O53  | 2.563 (12) |
| Ag20—S18  | 2.414 (5)   | Ag52—S5   | 2.511 (5)  |
| Ag20—S25  | 2.475 (5)   | Ag52—S10  | 2.665 (5)  |
| Ag21—Ag22 | 3.062 (2)   | Ag53—Ag63 | 3.054 (2)  |
| Ag21—Ag36 | 2.986 (2)   | Ag53—O49  | 2.554 (17) |
| Ag21—O64  | 2.427 (16)  | Ag53—O51  | 2.278 (14) |
| Ag21—S17  | 2.472 (5)   | Ag53—S6   | 2.519 (6)  |
| Ag21—S25  | 2.496 (5)   | Ag53—S10  | 2.549 (5)  |
| Ag22—Ag38 | 3.316 (2)   | Ag54—Ag55 | 3.053 (2)  |
| Ag22—O24  | 2.430 (11)  | Ag54—Ag64 | 3.031 (3)  |

|           |             |           |            |
|-----------|-------------|-----------|------------|
| Ag22—S17  | 2.467 (5)   | Ag54—O26  | 2.405 (11) |
| Ag22—S24  | 2.530 (6)   | Ag54—S6   | 2.539 (7)  |
| Ag23—Ag24 | 2.8636 (19) | Ag54—S9   | 2.467 (5)  |
| Ag23—Ag39 | 3.091 (2)   | Ag55—Ag56 | 3.086 (2)  |
| Ag23—O67  | 2.277 (15)  | Ag55—Ag64 | 3.187 (2)  |
| Ag23—S16  | 2.564 (5)   | Ag55—O47  | 2.426 (17) |
| Ag23—S24  | 2.531 (6)   | Ag55—S7   | 2.516 (5)  |
| Ag24—Ag41 | 2.937 (2)   | Ag55—S9   | 2.480 (5)  |
| Ag24—O68  | 2.300 (15)  | Ag56—Ag57 | 2.960 (2)  |
| Ag24—O69  | 2.544 (13)  | Ag56—Ag65 | 3.075 (3)  |
| Ag24—S16  | 2.619 (5)   | Ag56—O23  | 2.564 (11) |
| Ag24—S23  | 2.510 (5)   | Ag56—S7   | 2.466 (5)  |
| Ag25—Ag26 | 2.988 (2)   | Ag56—S8   | 2.430 (5)  |
| Ag25—Ag42 | 3.069 (2)   | Ag57—O20  | 2.473 (11) |
| Ag25—O19  | 2.481 (11)  | Ag57—O45  | 2.341 (12) |
| Ag25—O69  | 2.365 (14)  | Ag57—S1   | 2.552 (5)  |
| Ag25—S15  | 2.487 (5)   | Ag57—S8   | 2.495 (5)  |
| Ag25—S23  | 2.572 (5)   | Ag58—Ag59 | 2.866 (2)  |
| Ag26—Ag27 | 3.193 (3)   | Ag58—Ag66 | 2.979 (2)  |
| Ag26—Ag43 | 3.233 (2)   | Ag58—O44  | 2.302 (15) |
| Ag26—O14  | 2.514 (12)  | Ag58—O45  | 2.502 (13) |
| Ag26—S15  | 2.425 (5)   | Ag58—S1   | 2.529 (5)  |
| Ag26—S22  | 2.461 (6)   | Ag58—S14  | 2.602 (6)  |
| Ag27—Ag44 | 2.999 (3)   | Ag59—Ag66 | 3.261 (2)  |
| Ag27—O72  | 2.06 (3)    | Ag59—O41  | 2.42 (2)   |
| Ag27—S21  | 2.570 (6)   | Ag59—O43  | 2.304 (14) |
| Ag27—S22  | 2.472 (6)   | Ag59—S2   | 2.562 (6)  |
| Ag28—Ag29 | 3.147 (3)   | Ag59—S14  | 2.514 (6)  |
| Ag28—Ag45 | 3.010 (3)   | Ag60—O6   | 2.45 (3)   |
| Ag28—O10  | 2.426 (11)  | Ag60—O11  | 2.316 (10) |
| Ag28—O40  | 2.52 (2)    | Ag60—S2   | 2.456 (6)  |
| Ag28—S13  | 2.489 (7)   | Ag60—S3   | 2.505 (6)  |
| Ag28—S21  | 2.589 (6)   | Ag61—O35  | 2.399 (11) |
| Ag29—Ag47 | 3.204 (3)   | Ag61—S3   | 2.474 (6)  |
| Ag29—O38  | 2.33 (3)    | Ag61—S4   | 2.460 (6)  |
| Ag29—O39  | 2.38 (2)    | Ag62—Ag63 | 3.145 (2)  |
| Ag29—S13  | 2.639 (6)   | Ag62—O5   | 2.48 (3)   |
| Ag29—S20  | 2.629 (6)   | Ag62—O30  | 2.376 (10) |
| Ag30—Ag31 | 3.031 (3)   | Ag62—S4   | 2.585 (5)  |
| Ag30—Ag48 | 2.878 (3)   | Ag62—S5   | 2.493 (5)  |
| Ag30—O9   | 2.504 (11)  | Ag63—O27  | 2.308 (9)  |
| Ag30—S12  | 2.512 (6)   | Ag63—S5   | 2.442 (5)  |
| Ag30—S20  | 2.437 (6)   | Ag63—S6   | 2.478 (6)  |

|              |             |              |             |
|--------------|-------------|--------------|-------------|
| Ag31—Ag32    | 2.901 (3)   | Ag64—O22     | 2.345 (11)  |
| Ag31—O34     | 2.431 (11)  | Ag64—S6      | 2.438 (6)   |
| Ag31—O57     | 2.237 (19)  | Ag64—S7      | 2.459 (6)   |
| Ag31—S12     | 2.628 (5)   | Ag65—Ag66    | 3.178 (2)   |
| Ag31—S19     | 2.756 (5)   | Ag65—O7      | 2.52 (3)    |
| Ag32—Ag33    | 2.921 (2)   | Ag65—O18     | 2.379 (11)  |
| Ag32—Ag49    | 2.930 (2)   | Ag65—S1      | 2.466 (5)   |
| Ag32—O33     | 2.429 (11)  | Ag65—S7      | 2.543 (5)   |
| Ag32—O55     | 2.18 (2)    | Ag66—O16     | 2.326 (10)  |
| Ag32—S19     | 2.558 (5)   | Ag66—S1      | 2.436 (5)   |
| Ag33—Ag50    | 3.299 (2)   | Ag66—S2      | 2.469 (6)   |
| Ag33—O32     | 2.405 (10)  |              |             |
| O27—Ag1—O30  | 86.1 (4)    | O57—Ag31—S12 | 114.1 (6)   |
| O11—Ag2—O6   | 84.6 (8)    | O57—Ag31—S19 | 112.4 (6)   |
| O17—Ag5—O15  | 83.3 (4)    | O63—Ag36—S10 | 130.8 (5)   |
| O36—Ag6—O12  | 83.8 (4)    | O26—Ag37—S10 | 96.8 (3)    |
| S21—Ag7—S28  | 149.1 (6)   | O26—Ag37—S17 | 85.2 (3)    |
| O15—Ag8—O1   | 89.2 (6)    | O49—Ag37—O26 | 97.1 (6)    |
| O15—Ag8—S22  | 101.0 (3)   | O49—Ag37—S10 | 92.6 (4)    |
| O15—Ag8—S28  | 102.1 (3)   | O49—Ag37—S17 | 134.3 (4)   |
| S22—Ag8—O1   | 129.6 (7)   | S17—Ag37—S10 | 132.71 (16) |
| S22—Ag8—S28  | 135.6 (2)   | O50—Ag38—O65 | 107.7 (6)   |
| S28—Ag8—O1   | 88.2 (7)    | O50—Ag38—S9  | 88.4 (5)    |
| O1A—Ag9—O1   | 34.7 (9)    | O50—Ag38—S17 | 113.7 (5)   |
| O1A—Ag9—S27  | 86.4 (7)    | O65—Ag38—S9  | 109.7 (5)   |
| O1A—Ag9—S28  | 120.0 (7)   | O65—Ag38—S17 | 89.5 (5)    |
| O12—Ag9—O1   | 83.5 (6)    | S17—Ag38—S9  | 145.37 (15) |
| O12—Ag9—S27  | 111.2 (3)   | O24—Ag39—S9  | 85.5 (3)    |
| O12—Ag9—S28  | 104.4 (3)   | O24—Ag39—S16 | 95.3 (3)    |
| S27—Ag9—O1   | 119.4 (6)   | O66—Ag39—O24 | 99.4 (6)    |
| S27—Ag9—S28  | 137.22 (18) | O66—Ag39—S9  | 140.2 (5)   |
| S28—Ag9—O1   | 86.8 (6)    | O66—Ag39—S16 | 96.2 (5)    |
| O36—Ag10—S26 | 114.9 (3)   | S9—Ag39—S16  | 122.78 (17) |
| O36—Ag10—S27 | 103.1 (3)   | O48—Ag40—O23 | 135.4 (5)   |
| S26—Ag10—S27 | 140.12 (16) | O48—Ag40—S16 | 129.3 (4)   |
| O2—Ag11—O29  | 91.7 (7)    | S16—Ag40—O23 | 83.0 (3)    |
| O2—Ag11—S25  | 114.1 (8)   | O19—Ag41—S8  | 83.2 (3)    |
| O2—Ag11—S26  | 117.2 (8)   | O19—Ag41—S16 | 122.9 (3)   |
| O29—Ag11—S25 | 95.1 (3)    | S8—Ag41—S16  | 149.63 (17) |
| O29—Ag11—S26 | 109.2 (3)   | O46—Ag42—O70 | 110.3 (5)   |
| S26—Ag11—S25 | 121.42 (17) | O46—Ag42—S8  | 107.0 (4)   |
| O25—Ag12—S24 | 107.9 (3)   | O46—Ag42—S15 | 99.4 (4)    |
| O25—Ag12—S25 | 102.6 (3)   | O70—Ag42—S8  | 99.9 (3)    |

|              |             |              |             |
|--------------|-------------|--------------|-------------|
| S24—Ag12—S25 | 140.63 (18) | O70—Ag42—S15 | 100.1 (4)   |
| O21—Ag13—S23 | 116.1 (3)   | S8—Ag42—S15  | 138.64 (15) |
| O21—Ag13—S24 | 98.6 (3)    | O20—Ag43—S14 | 125.1 (3)   |
| S23—Ag13—S24 | 143.61 (16) | O20—Ag43—S15 | 83.0 (3)    |
| O3—Ag14—O17  | 90.1 (7)    | S14—Ag43—S15 | 150.90 (18) |
| O3—Ag14—S22  | 124.7 (7)   | O71—Ag44—O14 | 125.9 (9)   |
| O3—Ag14—S23  | 105.9 (7)   | O71—Ag44—S14 | 131.0 (9)   |
| O17—Ag14—S22 | 95.9 (3)    | S14—Ag44—O14 | 85.8 (3)    |
| O17—Ag14—S23 | 108.4 (3)   | O13—Ag45—O41 | 103.1 (6)   |
| S23—Ag14—S22 | 123.54 (18) | O13—Ag45—S21 | 84.6 (3)    |
| O40—Ag15—O10 | 81.1 (6)    | O42—Ag45—O13 | 153.8 (8)   |
| S20—Ag15—O10 | 98.1 (3)    | O42—Ag45—O41 | 50.8 (9)    |
| S20—Ag15—O40 | 102.5 (6)   | O42—Ag45—S21 | 121.4 (7)   |
| S20—Ag15—S28 | 156.33 (19) | S21—Ag45—O41 | 166.7 (5)   |
| S28—Ag15—O10 | 86.5 (3)    | S2—Ag46—O13  | 86.9 (3)    |
| S28—Ag15—O40 | 101.1 (6)   | S13—Ag46—O13 | 103.7 (3)   |
| S20—Ag16—S27 | 160.7 (2)   | S13—Ag46—S2  | 164.5 (2)   |
| O58—Ag17—S19 | 114.5 (6)   | S3—Ag47—O37  | 106.0 (5)   |
| O58—Ag17—S27 | 90.8 (6)    | S13—Ag47—O37 | 106.2 (5)   |
| O59—Ag17—O58 | 93.2 (6)    | S13—Ag47—S3  | 147.8 (2)   |
| O59—Ag17—S19 | 117.6 (4)   | S3—Ag48—S12  | 167.3 (2)   |
| O59—Ag17—S27 | 95.8 (4)    | O56—Ag49—S4  | 106.5 (6)   |
| S19—Ag17—S27 | 135.19 (15) | O56—Ag49—S12 | 99.8 (6)    |
| O60—Ag18—O61 | 102.0 (4)   | S4—Ag49—S12  | 153.62 (19) |
| O60—Ag18—S19 | 96.8 (4)    | S4—Ag50—O33  | 90.8 (3)    |
| O60—Ag18—S26 | 113.5 (4)   | S11—Ag50—O33 | 103.6 (3)   |
| O61—Ag18—S19 | 101.4 (3)   | S11—Ag50—S4  | 164.65 (17) |
| S26—Ag18—O61 | 86.8 (3)    | O31—Ag51—S5  | 82.2 (3)    |
| S26—Ag18—S19 | 146.31 (15) | O31—Ag51—S11 | 101.9 (3)   |
| O32—Ag19—S26 | 83.0 (3)    | O53—Ag51—O31 | 92.2 (4)    |
| O61—Ag19—O32 | 92.3 (4)    | O53—Ag51—S5  | 89.3 (3)    |
| O61—Ag19—S18 | 123.4 (3)   | O53—Ag51—S11 | 121.9 (3)   |
| O61—Ag19—S26 | 91.1 (3)    | S11—Ag51—S5  | 147.98 (17) |
| S18—Ag19—O32 | 102.9 (3)   | O52—Ag52—O53 | 104.1 (5)   |
| S18—Ag19—S26 | 144.17 (16) | O52—Ag52—S5  | 118.6 (6)   |
| S18—Ag20—O28 | 102.6 (3)   | O52—Ag52—S10 | 97.2 (5)    |
| S18—Ag20—S25 | 166.68 (18) | O53—Ag52—S10 | 101.7 (4)   |
| S25—Ag20—O28 | 90.0 (3)    | S5—Ag52—O53  | 86.0 (3)    |
| O64—Ag21—S17 | 107.5 (5)   | S5—Ag52—S10  | 140.58 (14) |
| O64—Ag21—S25 | 93.7 (5)    | O51—Ag53—O49 | 101.7 (6)   |
| S17—Ag21—S25 | 158.53 (17) | O51—Ag53—S6  | 102.7 (5)   |
| O24—Ag22—S17 | 112.9 (3)   | O51—Ag53—S10 | 108.8 (5)   |
| O24—Ag22—S24 | 87.1 (3)    | S6—Ag53—O49  | 101.5 (5)   |

|              |             |              |             |
|--------------|-------------|--------------|-------------|
| S17—Ag22—S24 | 156.67 (19) | S6—Ag53—S10  | 143.10 (15) |
| O67—Ag23—S16 | 109.3 (5)   | S10—Ag53—O49 | 90.6 (5)    |
| O67—Ag23—S24 | 104.7 (6)   | O26—Ag54—S6  | 86.9 (3)    |
| S24—Ag23—S16 | 141.40 (16) | O26—Ag54—S9  | 117.3 (3)   |
| O68—Ag24—O69 | 104.8 (5)   | S9—Ag54—S6   | 153.87 (19) |
| O68—Ag24—S16 | 96.3 (5)    | O47—Ag55—S7  | 92.6 (5)    |
| O68—Ag24—S23 | 114.7 (5)   | O47—Ag55—S9  | 110.3 (5)   |
| O69—Ag24—S16 | 101.5 (3)   | S9—Ag55—S7   | 157.05 (17) |
| S23—Ag24—O69 | 87.8 (3)    | S7—Ag56—O23  | 90.5 (3)    |
| S23—Ag24—S16 | 144.35 (15) | S8—Ag56—O23  | 103.0 (3)   |
| O19—Ag25—S15 | 102.9 (3)   | S8—Ag56—S7   | 166.39 (19) |
| O19—Ag25—S23 | 82.5 (3)    | O20—Ag57—S1  | 83.6 (3)    |
| O69—Ag25—O19 | 91.6 (4)    | O20—Ag57—S8  | 103.0 (3)   |
| O69—Ag25—S15 | 123.7 (3)   | O45—Ag57—O20 | 93.7 (4)    |
| O69—Ag25—S23 | 90.4 (3)    | O45—Ag57—S1  | 88.8 (4)    |
| S15—Ag25—S23 | 144.86 (17) | O45—Ag57—S8  | 121.5 (3)   |
| S15—Ag26—O14 | 104.0 (3)   | S8—Ag57—S1   | 147.97 (16) |
| S15—Ag26—S22 | 163.36 (19) | O44—Ag58—O45 | 103.0 (5)   |
| S22—Ag26—O14 | 90.4 (3)    | O44—Ag58—S1  | 107.7 (5)   |
| O72—Ag27—S21 | 100.5 (9)   | O44—Ag58—S14 | 100.8 (5)   |
| O72—Ag27—S22 | 108.5 (9)   | O45—Ag58—S1  | 85.8 (3)    |
| S22—Ag27—S21 | 150.3 (2)   | O45—Ag58—S14 | 104.6 (4)   |
| O10—Ag28—O40 | 84.5 (5)    | S1—Ag58—S14  | 146.55 (16) |
| O10—Ag28—S13 | 88.2 (3)    | O41—Ag59—S2  | 96.4 (6)    |
| O10—Ag28—S21 | 107.4 (3)   | O41—Ag59—S14 | 104.7 (7)   |
| O40—Ag28—S21 | 98.6 (6)    | O43—Ag59—O41 | 95.7 (7)    |
| S13—Ag28—O40 | 118.5 (7)   | O43—Ag59—S2  | 97.1 (5)    |
| S13—Ag28—S21 | 141.1 (2)   | O43—Ag59—S14 | 116.8 (4)   |
| O38—Ag29—O39 | 91.8 (9)    | S14—Ag59—S2  | 137.22 (17) |
| O38—Ag29—S13 | 95.3 (7)    | O6—Ag60—S2   | 92.0 (7)    |
| O38—Ag29—S20 | 105.7 (7)   | O6—Ag60—S3   | 120.2 (7)   |
| O39—Ag29—S13 | 104.7 (6)   | O11—Ag60—O6  | 84.4 (6)    |
| O39—Ag29—S20 | 92.7 (6)    | O11—Ag60—S2  | 112.8 (3)   |
| S20—Ag29—S13 | 152.29 (16) | O11—Ag60—S3  | 103.6 (3)   |
| O9—Ag30—S12  | 105.6 (3)   | S2—Ag60—S3   | 133.50 (19) |
| S20—Ag30—O9  | 86.4 (3)    | O35—Ag61—S3  | 107.1 (3)   |
| S20—Ag30—S12 | 163.42 (19) | O35—Ag61—S4  | 101.0 (3)   |
| O34—Ag31—S12 | 80.1 (3)    | S4—Ag61—S3   | 140.52 (19) |
| O34—Ag31—S19 | 92.8 (3)    | O5—Ag62—S4   | 84.4 (7)    |
| O57—Ag31—O34 | 134.6 (8)   | O5—Ag62—S5   | 144.3 (7)   |
| S12—Ag31—S19 | 120.07 (16) | O30—Ag62—O5  | 84.4 (6)    |
| O33—Ag32—S19 | 85.1 (3)    | O30—Ag62—S4  | 93.2 (3)    |
| O55—Ag32—O33 | 139.2 (7)   | O30—Ag62—S5  | 110.7 (3)   |

|                      |             |                         |             |
|----------------------|-------------|-------------------------|-------------|
| O55—Ag32—S19         | 132.2 (6)   | S5—Ag62—S4              | 124.85 (18) |
| O32—Ag33—S11         | 83.0 (3)    | O27—Ag63—S5             | 114.9 (3)   |
| O32—Ag33—S19         | 123.9 (3)   | O27—Ag63—S6             | 99.8 (3)    |
| S11—Ag33—S19         | 149.84 (17) | S5—Ag63—S6              | 143.65 (16) |
| O54—Ag34—O62         | 107.4 (4)   | O22—Ag64—S6             | 107.7 (3)   |
| O54—Ag34—S11         | 99.0 (4)    | O22—Ag64—S7             | 101.6 (3)   |
| O54—Ag34—S18         | 103.4 (4)   | S6—Ag64—S7              | 137.98 (19) |
| O62—Ag34—S11         | 98.8 (4)    | O7—Ag65—S7              | 85.5 (7)    |
| O62—Ag34—S18         | 106.2 (4)   | O18—Ag65—O7             | 86.5 (6)    |
| S18—Ag34—S11         | 139.30 (14) | O18—Ag65—S1             | 111.1 (3)   |
| O31—Ag35—S10         | 123.4 (3)   | O18—Ag65—S7             | 96.7 (3)    |
| O31—Ag35—S18         | 85.2 (3)    | S1—Ag65—O7              | 141.3 (7)   |
| S18—Ag35—S10         | 141.75 (17) | S1—Ag65—S7              | 123.98 (18) |
| O28—Ag36—S10         | 84.8 (3)    | O16—Ag66—S1             | 115.7 (3)   |
| O63—Ag36—O28         | 142.0 (6)   | O16—Ag66—S2             | 103.8 (3)   |
| S1—Ag66—S2           | 138.53 (17) |                         |             |
| <b>SD/Ag66d</b>      |             |                         |             |
| Ag1—Ag14             | 3.152 (3)   | Ag8—Ag16                | 2.974 (3)   |
| Ag1—O7 <sup>i</sup>  | 2.299 (12)  | Ag8—O3                  | 2.284 (15)  |
| Ag1—S2               | 2.388 (6)   | Ag8—S8                  | 2.405 (6)   |
| Ag1—S8 <sup>i</sup>  | 2.437 (5)   | Ag9—Ag10                | 3.017 (4)   |
| Ag2—Ag3              | 2.632 (6)   | Ag9—Ag16                | 3.114 (4)   |
| Ag2—Ag5 <sup>i</sup> | 3.028 (7)   | Ag9—O19                 | 2.43 (4)    |
| Ag2—O10 <sup>i</sup> | 2.561 (14)  | Ag9—S8                  | 2.469 (6)   |
| Ag2—O14              | 1.63 (3)    | Ag10—Ag16               | 3.282 (4)   |
| Ag2—S1               | 2.687 (7)   | Ag10—O1                 | 2.27 (4)    |
| Ag2—S2               | 2.676 (7)   | Ag10—O5                 | 2.385 (12)  |
| Ag3—Ag4              | 3.246 (7)   | Ag10—S1 <sup>i</sup>    | 2.943 (8)   |
| Ag3—Ag15             | 2.896 (5)   | Ag10—S6                 | 2.590 (6)   |
| Ag3—O10 <sup>i</sup> | 2.515 (14)  | Ag11—Ag11 <sup>ii</sup> | 3.268 (5)   |
| Ag3—O14              | 2.35 (3)    | Ag11—Ag12               | 2.942 (3)   |
| Ag3—S2               | 2.529 (7)   | Ag11—Ag13               | 3.125 (3)   |
| Ag3—S3               | 2.421 (6)   | Ag11—S5                 | 2.406 (8)   |
| Ag4—Ag5              | 3.305 (6)   | Ag11—S6                 | 2.512 (6)   |
| Ag4—Ag6              | 3.213 (6)   | Ag12—Ag13               | 2.999 (3)   |
| Ag4—Ag12             | 3.210 (5)   | Ag12—O16                | 2.36 (4)    |
| Ag4—S3               | 2.437 (7)   | Ag12—S4                 | 2.560 (7)   |
| Ag4—S4               | 2.623 (8)   | Ag12—S6                 | 2.557 (6)   |
| Ag5—Ag2 <sup>i</sup> | 3.028 (7)   | Ag13—Ag13 <sup>ii</sup> | 3.355 (4)   |
| Ag5—Ag6              | 2.802 (6)   | Ag13—O6                 | 2.325 (12)  |
| Ag5—S1 <sup>i</sup>  | 2.706 (7)   | Ag13—O11                | 2.517 (16)  |
| Ag5—S3               | 2.414 (7)   | Ag13—S4                 | 2.457 (7)   |
| Ag6—Ag10             | 2.899 (6)   | Ag13—S5                 | 2.454 (7)   |



|                                                           |             |                                        |             |
|-----------------------------------------------------------|-------------|----------------------------------------|-------------|
| Ag6—Ag12                                                  | 2.873 (4)   | Ag14—O9                                | 2.354 (12)  |
| Ag6—O8                                                    | 2.392 (11)  | Ag14—O12                               | 2.49 (2)    |
| Ag6—O17                                                   | 2.21 (3)    | Ag14—S2                                | 2.502 (5)   |
| Ag6—S1 <sup>i</sup>                                       | 2.627 (6)   | Ag14—S4                                | 2.496 (7)   |
| Ag6—S6                                                    | 2.848 (7)   | Ag15—O15 <sup>i</sup>                  | 2.54 (3)    |
| Ag7—Ag7 <sup>ii</sup>                                     | 2.940 (7)   | Ag15—O15                               | 2.54 (3)    |
| Ag7—Ag10                                                  | 2.919 (6)   | Ag15—S3                                | 2.536 (6)   |
| Ag7—Ag11                                                  | 2.848 (5)   | Ag15—S3 <sup>i</sup>                   | 2.536 (6)   |
| Ag7—Ag16                                                  | 3.358 (4)   | Ag16—Ag16 <sup>ii</sup>                | 3.071 (3)   |
| Ag7—O4                                                    | 2.188 (13)  | Ag16—O2                                | 2.36 (3)    |
| Ag7—S6                                                    | 2.471 (6)   | Ag16—S7                                | 2.479 (5)   |
| Ag7—S7                                                    | 2.496 (6)   | Ag16—S8                                | 2.525 (5)   |
| O7 <sup>i</sup> —Ag1—S2                                   | 109.0 (4)   | O1—Ag10—S1 <sup>i</sup>                | 106.8 (10)  |
| O7 <sup>i</sup> —Ag1—S8 <sup>i</sup>                      | 102.5 (4)   | O1—Ag10—S6                             | 120.7 (10)  |
| S2—Ag1—S8 <sup>i</sup>                                    | 142.66 (19) | O5—Ag10—S1 <sup>i</sup>                | 88.9 (3)    |
| O10 <sup>i</sup> —Ag2—S1                                  | 100.9 (4)   | O5—Ag10—S6                             | 85.1 (3)    |
| O10 <sup>i</sup> —Ag2—S2                                  | 79.5 (4)    | S6—Ag10—S1 <sup>i</sup>                | 115.5 (2)   |
| O14—Ag2—O10 <sup>i</sup>                                  | 102.1 (10)  | S5—Ag11—S6                             | 149.5 (3)   |
| O14—Ag2—S1                                                | 128.3 (10)  | O16—Ag12—S4                            | 102.4 (9)   |
| O14—Ag2—S2                                                | 104.3 (10)  | O16—Ag12—S6                            | 106.1 (8)   |
| S2—Ag2—S1                                                 | 125.1 (3)   | S6—Ag12—S4                             | 148.4 (2)   |
| O10 <sup>i</sup> —Ag3—S2                                  | 83.2 (4)    | O6—Ag13—O11                            | 82.0 (5)    |
| O14—Ag3—O10 <sup>i</sup>                                  | 85.6 (8)    | O6—Ag13—S4                             | 104.6 (3)   |
| O14—Ag3—S2                                                | 90.2 (7)    | O6—Ag13—S5                             | 113.2 (3)   |
| O14—Ag3—S3                                                | 118.9 (7)   | S4—Ag13—O11                            | 111.0 (4)   |
| S3—Ag3—O10 <sup>i</sup>                                   | 109.4 (4)   | S5—Ag13—O11                            | 91.6 (4)    |
| S3—Ag3—S2                                                 | 148.4 (3)   | S5—Ag13—S4                             | 138.3 (2)   |
| S3—Ag4—S4                                                 | 153.6 (3)   | O9—Ag14—O12                            | 88.1 (5)    |
| S3—Ag5—S1 <sup>i</sup>                                    | 137.7 (3)   | O9—Ag14—S2                             | 107.1 (3)   |
| O8—Ag6—S1 <sup>i</sup>                                    | 85.0 (3)    | O9—Ag14—S4                             | 99.2 (3)    |
| O8—Ag6—S6                                                 | 95.2 (4)    | O12—Ag14—S2                            | 103.6 (4)   |
| O17—Ag6—O8                                                | 117.0 (10)  | S4—Ag14—O12                            | 121.1 (4)   |
| O17—Ag6—S1 <sup>i</sup>                                   | 120.5 (9)   | S4—Ag14—S2                             | 128.5 (2)   |
| O17—Ag6—S6                                                | 114.4 (9)   | O15 <sup>i</sup> —Ag15—O15             | 102.8 (10)  |
| S1 <sup>i</sup> —Ag6—S6                                   | 117.6 (2)   | S3—Ag15—O15 <sup>i</sup>               | 97.1 (6)    |
| O4—Ag7—S6                                                 | 117.2 (5)   | S3 <sup>i</sup> —Ag15—O15 <sup>i</sup> | 102.1 (6)   |
| O4—Ag7—S7                                                 | 86.0 (6)    | S3—Ag15—O15                            | 102.1 (6)   |
| S6—Ag7—S7                                                 | 155.1 (2)   | S3—Ag15—S3 <sup>i</sup>                | 149.1 (3)   |
| O3—Ag8—S8                                                 | 106.77 (14) | O2—Ag16—S7                             | 102.1 (9)   |
| S8 <sup>ii</sup> —Ag8—S8                                  | 143.1 (3)   | O2—Ag16—S8                             | 99.5 (9)    |
| O19—Ag9—S8                                                | 102.4 (9)   | S7—Ag16—S8                             | 156.35 (18) |
| O1—Ag10—O5                                                | 136.3 (12)  |                                        |             |
| Symmetry codes: (i) $-x+2, -y+1, z$ ; (ii) $x, y, -z+1$ . |             |                                        |             |

## Reference:

1. Wang, Z.; Su, H.-F.; Wang, X.-P.; Zhao, Q.-Q.; Tung, C.-H.; Sun, D.; Zheng, L.-S. Johnson Solids: anion-templated silver thiolate clusters capped by sulfonate. *Chem-Eur J* **2018**, *24*, 1640-1650.
2. Klemperer, W. G.; *Inorg. Synth*, **1992**, *27*, 74-85
3. *CrysAlisPro*, Rigaku OD, The Woodlands, TX, **2015**.
4. Bruker AXS, APEX2, V2008.6; SADABS V2008/1; SAINT V7.60A; SHELXTL V6.14; Bruker AXS Inc.: Madison, Wisconsin, USA, **2008**.
5. Palatinus, L.; Chapuis, G. Superflip - a computer program for the solution of crystal structures by charge flipping in arbitrary dimensions. *J. Appl. Crystallogr.* **2007**, *40*, 786-790.
6. Sheldrick, G. M.; Crystal structure refinement with SHELXL. *Acta. Crystallogr., Sect. C.* **2015**, *71*, 3-8.
7. Dolomanov, O. V.; Bourhis, L. J.; Gildea, R. J.; Howard, J. A. K.; Puschmann, H. OLEX2: a complete structure solution, refinement and analysis program. *J. Appl. Crystallogr.* **2009**, *42*, 339-341.
8. Spek, A. L., Structure validation in chemical crystallography. *Acta. Crystallogr., Sect. D.* **2009**, *65*, 148-155.
9. Spek, A. L. *Acta. Crystallogr., Sect. C.* **2015**, *71*, 9-18.
